# Supplementary material for: Social Learning in Information Technology Investment: The Role of Board Interlocks
Source: Atypon-hosted journal article supplement (doi:10.1287/mnsc.2019.3548), 2020-07-30
Supplement: mnsc.2019.3548.sm1.XLSX [file mnsc.2019.3548.sm1.XLSX]

## Sheet: IWRANKING
Ranking	Company_Name_IW	year	gvkey
NA	A&E Television Networks	2005
NA	Acuity,A Mutual Insurance Co.	2005
NA	Advocate Health Care	2005
NA	Agfa-Gevaert Group	2005
NA	Allina Hospitals & Clinics	2005
NA	Altadis USA Inc.	2005
NA	Alticor Inc.	2005
NA	America Online Inc.	2005
NA	American Century Investments	2005
NA	American Red Cross	2005
NA	American Suzuki Motor Corp.	2005
NA	Ansell Healthcare Inc.	2005
NA	Arkansas Blue Cross and Blue Shield	2005
NA	Aurora Health Care	2005
NA	Banner Health	2005
NA	Baptist Memorial Health Care Corp.	2005
NA	Barton Malow	2005
NA	Bax Global Inc.	2005
NA	Bayer Corp.	2005
NA	Baylor Health Care System	2005
NA	BDO Seidman LLP	2005
NA	Black & Veatch Holding Co.	2005
NA	Blue Cross and Blue Shield of N.C.	2005
NA	Blue Cross Blue Shield of Florida	2005
NA	Blue Cross Blue Shield of Mass.	2005
NA	Boscov's Department Stores LLC	2005
NA	Capgemini	2005
NA	Capital BlueCross	2005
NA	CareGroup Healthcare System	2005
NA	Caritas Christi Health Care System	2005
NA	Carlson Companies Inc.	2005
NA	Carson Industries LLC	2005
NA	Catholic Health Initiatives	2005
NA	Catholic Healthcare West	2005
NA	Chamberlain Group Inc.	2005
NA	Club Corp Inc.	2005
NA	CMC Americas Inc.	2005
NA	CUNA Mutual Group	2005
NA	Deloitte Consulting	2005
NA	Duke University Health System	2005
NA	E.&J. Gallo Winery	2005
NA	Elementis Inc.	2005
NA	Enterprise Rent-A-Car Co.	2005
NA	Ernst & Young LLP	2005
NA	Evanston Northwestern Healthcare Corp.	2005
NA	Ferguson Enterprises Inc.	2005
NA	Fidelity Information Services Inc.	2005
NA	FMR Corp. (Fidelity Investments)	2005
NA	Gedas USA	2005
NA	Getronics	2005
NA	Growmark Inc.	2005
NA	Hatch Group	2005
NA	Health Care Service Corp.	2005
NA	Hearst Corp.	2005
NA	Highmark Inc.	2005
NA	HIP Health Plan of New York	2005
NA	Horizon Blue Cross Blue Shield of N.J.	2005
NA	Intermountain Health Care Inc.	2005
NA	Invensys	2005
NA	J.R. Simplot Co.	2005
NA	JM Family Enterprises Inc.	2005
NA	Kuehne & Nagel Inc.	2005
NA	Lands' End Inc.	2005
NA	Lehman Brothers Inc.	2005
NA	Loreal USA Inc.	2005
NA	M.A. Mortenson Co.	2005
NA	Maritz Inc.	2005
NA	Memorial Healthcare System	2005
NA	Milliken Chemical	2005
NA	Mitsubishi Motors North America Inc.	2005
NA	National City Mortgage Co.	2005
NA	Navy Federal Credit Union	2005
NA	Network Services Co.	2005
NA	New York City Health & Hospital Corp.	2005
NA	OhioHealth	2005
NA	Ostsuka America Pharmaceutical Inc.	2005
NA	Panalpina Inc.	2005
NA	Poudre Valley Health System	2005
NA	PriceWaterHouseCoopers LLC	2005
NA	Pulte Homes Inc.	2005
NA	Putnam Investments	2005
NA	Quixtar Inc.	2005
NA	RBC Dain Rauscher Inc.	2005
NA	Retail Ventures Inc.	2005
NA	Rieter Automotive NA Inc.	2005
NA	Roche Diagnostics	2005
NA	SC Johnson & Son Inc.	2005
NA	Saint Luke's Health System	2005
NA	Salvation Army USA West	2005
NA	SAP America Inc.	2005
NA	SAS Institute Inc.	2005
NA	Securian Financial Group Inc.	2005
NA	Skanska USA Building Inc.	2005
NA	Sky Ridge Medical Center	2005
NA	Smiths Aerospace	2005
NA	Solvay Pharmaceuticals Inc.	2005
NA	Southwire Co.	2005
NA	St. Joseph Health System	2005
NA	Sutter Health	2005
NA	Swinerton Inc.	2005
NA	Taiyo Yuden (USA) Ltd.	2005
NA	Teck Cominco American Inc.	2005
NA	Texas Health Resources	2005
NA	Towers Perrin	2005
NA	Tufts Associated Health Plans Inc.	2005
NA	Turner Construction Co.	2005
NA	UniGroup Inc.	2005
NA	Union Bank of California	2005
NA	University Hospitals Health System	2005
NA	University of Arkansas for Medical Sciences	2005
NA	University of Wisconsin Hospital & Clinics Authority	2005
NA	UPMC Health System	2005
NA	Vanguard Group	2005
NA	Verizon Wireless	2005
NA	Warner Bros. Entertainment Inc.	2005
NA	Willis NA	2005
NA	Wm. Wrigley Jr. Co.	2005
104	Mellon Private Wealth Management	2006
112	Skanska USA Building Inc.	2006
116	Acuity, A Mutual Insurance Co.	2006
118	Ernst & Young LLP	2006
121	Verizon Telecom	2006
125	CUNA Mutual Group	2006
132	Baylor Health Care System	2006
139	Cincinnati Children's Hospital Medical Center	2006
147	Quixtar Inc.	2006
150	William Beaumont Hospital	2006
151	Watkins Motor Lines	2006
157	Federal Home Loan Bank of Atlanta	2006
160	Foley & Lardner LLP	2006
168	Carolinas HealthCare System	2006
169	Capital BlueCross	2006
170	Highmark Inc.	2006
172	Blue Cross Blue Shield of South Carolina	2006
176	Marcus & Millichap	2006
178	Vanguard Group	2006
18	S.C. Johnson & Son Inc.	2006
194	Roche Diagnostics	2006
198	Pershing LLC	2006
209	Automotive Resources International	2006
211	Texas Health Resources	2006
215	Verizon Wireless	2006
218	American Suzuki Motor Corp.	2006
224	Sutter Health	2006
225	Chamberlain Group Inc.	2006
23	E.&J. Gallo Winery	2006
231	OneAmerica Financial Partners	2006
236	Poudre Valley Health System	2006
24	Southwire Co.	2006
240	Capmark Financial Group Inc.	2006
245	Securian Financial Group Inc.	2006
248	Do it Best Corp.	2006
249	AARP	2006
31	MassMutual Financial Group	2006
34	HIP Health Plan of New York	2006
43	St. Jude Children's Research Hospital Inc.	2006
45	Intermountain Health Care Inc.	2006
46	The Haskell Co.	2006
47	Beth Israel Deaconess Medical Center	2006
61	Saint Luke's Health System	2006
72	University of Pittsburgh Medical Center (UPMC)	2006
80	Univ. of Texas MD Anderson Cancer Center	2006
84	NBC Universal Inc.	2006
85	Pulte Homes Inc.	2006
89	UniGroup Inc.	2006
9	JM Family Enterprises Inc.	2006
91	Evanston Northwestern Healthcare Corp.	2006
93	Maritz Inc.	2006
95	St. Joseph Health System	2006
NA	A&E Television Networks	2006
NA	AARP	2006
NA	Access Business Group	2006
NA	Acer Inc.	2006
NA	Acuity, A Mutual Insurance Co.	2006
NA	Advocate Health Care	2006
NA	Altadis USA Inc.	2006
NA	Alticor	2006
NA	American Century Investments	2006
NA	American Suzuki Motor Corp.	2006
NA	AmerUs Group Co.	2006
NA	Ansell Healthcare Inc.	2006
NA	Arkansas Blue Cross Blue Shield	2006
NA	Aurora Health Care	2006
NA	Automotive Resources International	2006
NA	Barton Malow Co.	2006
NA	Bax Global Inc.	2006
NA	Bayer Corp.	2006
NA	Baylor Health Care System	2006
NA	BDO Seidman LLP	2006
NA	Beth Israel Deaconess Medical Center	2006
NA	Black & Veatch Holding Co	2006
NA	Blue Cross Blue Shield of North Carolina	2006
NA	Blue Cross Blue Shield of South Carolina	2006
NA	Boscov's Department Store LLC	2006
NA	Capgemini	2006
NA	Capital BlueCross	2006
NA	Capmark Financial Group Inc.	2006
NA	Caritas Christi Health Care System	2006
NA	Carolinas HealthCare System	2006
NA	Catholic Healthcare Partners	2006
NA	Catholic Healthcare West	2006
NA	Chamberlain Group Inc.	2006
NA	Cincinnati Children's Hospital Medical Center	2006
NA	ClubCorp. Inc.	2006
NA	CMC Americas Inc.	2006
NA	CUNA Mutual Group	2006
NA	Deloitte & Touche USA LLP	2006
NA	Do it Best Corp.	2006
NA	E.&J. Gallo Winery	2006
NA	Edward Don Company	2006
NA	Enterprise Rent-A-Car Co.	2006
NA	Ernst & Young LLP	2006
NA	Evanston Northwestern Healthcare Corp.	2006
NA	Fairview Health Services	2006
NA	Federal Home Loan Bank of Atlanta	2006
NA	Foley & Lardner LLP	2006
NA	Geisinger Health System	2006
NA	Growmark Inc.	2006
NA	Hartford Hospital	2006
NA	Harvard Pilgrim Health Care Inc.	2006
NA	Heritage Asset Management	2006
NA	Highmark Inc.	2006
NA	HIP Health Plan of New York	2006
NA	Horizon Blue Cross Blue Shield of New Jersey	2006
NA	Intermountain Health Care Inc.	2006
NA	Invensys PLC	2006
NA	J.R. Simplot Co.	2006
NA	JM Family Enterprises Inc.	2006
NA	Kaiser Permanente	2006
NA	Lifetime Entertainment Services	2006
NA	Manheim	2006
NA	Manufacturers Railway Co.	2006
NA	Marcus & Millichap	2006
NA	Maritz Inc.	2006
NA	MassMutual Financial Group	2006
NA	Mellon Private Wealth Management	2006
NA	Memorial Healthcare System	2006
NA	Mitsubishi Motors North America Inc.	2006
NA	Mohegan Sun Resort	2006
NA	National City Mortgage Co.	2006
NA	Nationwide Mutual Insurance Co.	2006
NA	Navy Federal Credit Union	2006
NA	NBC Universal Inc.	2006
NA	Nebraska Furniture Mart Inc.	2006
NA	Network Services Co.	2006
NA	OhioHealth	2006
NA	OneAmerica Financial Partners	2006
NA	Oregon Cutting Systems	2006
NA	Panalpina Inc.	2006
NA	Pershing LLC	2006
NA	PFPC Worldwide Inc.	2006
NA	Poudre Valley Health System	2006
NA	PricewaterhouseCoopers LLC	2006
NA	Pulte Homes Inc.	2006
NA	Putnam Investments	2006
NA	Quixtar Inc.	2006
NA	Raley's Inc.	2006
NA	RBC Dain Rauscher Corp.	2006
NA	Reston Hospital Center	2006
NA	Retail Ventures Inc.	2006
NA	Rich Products Corp.	2006
NA	Rieter Automotive NA Inc.	2006
NA	Roche Diagnostics	2006
NA	S.C. Johnson & Son Inc.	2006
NA	Safeco Insurance	2006
NA	Saint Luke's Health System	2006
NA	Salvation Army, U.S.A Western Territory	2006
NA	SAP America Inc.	2006
NA	Securian Financial Group Inc.	2006
NA	Sharp HealthCare	2006
NA	Sioux Valley Hospitals & Health System	2006
NA	Skanska USA Building Inc.	2006
NA	Smiths Aerospace	2006
NA	Solvay Pharmaceuticals Inc.	2006
NA	Southwire Co.	2006
NA	St. Joseph Health System	2006
NA	St. Jude Children's Research Hospital Inc.	2006
NA	Starz Entertainment Group	2006
NA	Stock Building Supply Inc.	2006
NA	Sutter Health	2006
NA	Swinerton Incorporated	2006
NA	Taiyo Yuden (USA) Ltd.	2006
NA	Teck Cominco Ltd.	2006
NA	Texas Health Resources	2006
NA	The Haskell Co.	2006
NA	Thomson Corp.	2006
NA	Towers Perrin	2006
NA	Toyota Motor Sales U.S.A Inc.	2006
NA	Travelers of New Jersey	2006
NA	UGS Corp.	2006
NA	UniGroup Inc.	2006
NA	Union Bank of California	2006
NA	Univ. of Texas MD Anderson Cancer Center	2006
NA	University of Pittsburgh Medical Center (UPMC)	2006
NA	Vanguard Group	2006
NA	Verizon Telecom	2006
NA	Verizon Wireless	2006
NA	Watkins Motor Lines	2006
NA	William Beaumont Hospital	2006
101	Poudre Valley Health System	2007
102	OTN	2007
105	University of Pittsburgh Medical Center (UPMC)	2007
107	Scottrade Inc.	2007
109	Federal Home Loan Bank of Atlanta	2007
11	Schwan Food Co.	2007
111	Univ. of Texas MD Anderson Cancer Center	2007
124	JPMorgan Chase & Co.	2007
125	Synovus Financial Corp.	2007
128	Screen Actors Guild-Producers Pension & Health Plans	2007
129	Sharp HealthCare	2007
131	SAS Institute Inc.	2007
136	Maritz Inc.	2007
137	UniGroup Inc.	2007
142	Barton Malow Co.	2007
15	Baylor Health Care System	2007
153	Growmark Inc.	2007
155	M. A. Mortenson Co.	2007
158	Webcor Builders Inc.	2007
16	T-Mobile USA	2007
160	Acuity, A Mutual Insurance Co.	2007
162	Pershing LLC	2007
166	Salvation Army, U.S.A Western Territory	2007
172	Horizon Blue Cross Blue Shield of New Jersey	2007
173	Cincinnati Children's Hospital Medical Center	2007
177	Panalpina Inc.	2007
190	Swinerton Inc.	2007
191	American Red Cross	2007
195	Gilbane Building Co.	2007
196	Oregon Cutting Systems	2007
197	Beth Israel Deaconess Medical Center	2007
202	Boscov's Department Store LLC	2007
203	Arkansas Blue Cross Blue Shield	2007
205	PricewaterhouseCoopers LLC	2007
213	Austin Energy	2007
215	Fairview Health Services	2007
216	Blue Cross Blue Shield of North Carolina	2007
217	St. Joseph Health System	2007
218	Grange Insurance Co.	2007
220	Carolinas HealthCare System	2007
223	Intermountain Healthcare Inc.	2007
226	Saint Luke's Health System, Inc.	2007
228	Do it Best Corp.	2007
231	Roche Diagnostics	2007
232	Spiegel Brands Inc.	2007
233	Marcus & Millichap	2007
238	Securian Financial Group Inc.	2007
246	Chamberlain Group Inc.	2007
248	Capgemini U.S. LLC.	2007
3	Vanguard Group	2007
32	Foley & Lardner LLP	2007
35	E.&J. Gallo Winery	2007
41	CUNA Mutual Group	2007
42	Morrison & Foerster LLP	2007
44	Mitsubishi Motors North America Inc.	2007
46	Southwire Co.	2007
47	Texas Health Resources	2007
54	Pacific Northwest National Laboratory	2007
62	Highmark Inc.	2007
66	MassMutual Financial Group	2007
69	St. Jude Children's Research Hospital Inc.	2007
70	Thomson Financial	2007
71	Quixtar Inc.	2007
73	Ernst & Young LLP	2007
76	Worldspan LP	2007
85	Skanska USA Building Inc.	2007
86	Verizon Telecom	2007
87	Advocate Health Care	2007
92	Pulte Homes Inc.	2007
97	Capital BlueCross	2007
NA	Access Business Group	2007
NA	Acer Inc.	2007
NA	Acuity, A Mutual Insurance Co.	2007
NA	Advocate Health Care	2007
NA	Altadis USA Inc.	2007
NA	American Century Investments	2007
NA	American Red Cross	2007
NA	American Suzuki Motor Corp.	2007
NA	Amtrak	2007
NA	Ansell Healthcare Inc.	2007
NA	Arkansas Blue Cross Blue Shield	2007
NA	Atos Origin Inc.	2007
NA	Aurora Health Care	2007
NA	Austin Energy	2007
NA	Automotive Resources International	2007
NA	Aviva USA	2007
NA	Barton Malow Co.	2007
NA	Bayer Corp.	2007
NA	Baylor Health Care System	2007
NA	BDO Seidman LLP	2007
NA	Beth Israel Deaconess Medical Center	2007
NA	Blue Cross Blue Shield of North Carolina	2007
NA	Boscov's Department Store LLC	2007
NA	Capgemini U.S. LLC.	2007
NA	Capital BlueCross	2007
NA	Capmark Financial Group Inc.	2007
NA	Carolinas HealthCare System	2007
NA	Catholic Healthcare Partners	2007
NA	Chamberlain Group Inc.	2007
NA	Cincinnati Children's Hospital Medical Center	2007
NA	CUNA Mutual Group	2007
NA	Do it Best Corp.	2007
NA	E.&J. Gallo Winery	2007
NA	Edward Don & Co.	2007
NA	Enterprise Rent-A-Car Company	2007
NA	Ernst & Young LLP	2007
NA	Evanston Northwestern Healthcare Corp.	2007
NA	Fairview Health Services	2007
NA	Federal Home Loan Bank of Atlanta	2007
NA	Fidelity Investments Institutional Services Co. Inc.	2007
NA	Flint Hills Resources	2007
NA	Foley & Lardner LLP	2007
NA	Geisinger Health System	2007
NA	Gilbane Building Co.	2007
NA	GlaxoSmithKline Holdings (America) Inc.	2007
NA	Gordon Food Service	2007
NA	Grange Insurance Co.	2007
NA	Growmark Inc.	2007
NA	Harvard Pilgrim Health Care Inc.	2007
NA	Haskell Co.	2007
NA	Health Alliance Plan	2007
NA	Heritage Asset Management	2007
NA	Highmark Inc.	2007
NA	Horizon Blue Cross Blue Shield of New Jersey	2007
NA	Infor Global Solutions	2007
NA	Intermountain Healthcare Inc.	2007
NA	J.R. Simplot Co.	2007
NA	JPMorgan Chase & Co.	2007
NA	Lifetime Entertainment Services	2007
NA	M. A. Mortenson Co.	2007
NA	Manheim	2007
NA	Marcus & Millichap	2007
NA	Maritz Inc.	2007
NA	MassMutual Financial Group	2007
NA	Mitsubishi Motors North America Inc.	2007
NA	Mohegan Sun Resort	2007
NA	Morrison & Foerster LLP	2007
NA	National City Mortgage Co.	2007
NA	Nationwide Mutual Insurance Co.	2007
NA	NBC Universal Inc.	2007
NA	Nebraska Furniture Mart Inc.	2007
NA	Network Services Co.	2007
NA	OneAmerica Financial Partners	2007
NA	Oregon Cutting Systems	2007
NA	OTN	2007
NA	Pacific Northwest National Laboratory	2007
NA	Panalpina Inc.	2007
NA	Pershing LLC	2007
NA	PFPC Worldwide Inc.	2007
NA	Poudre Valley Health System	2007
NA	PricewaterhouseCoopers LLC	2007
NA	Pulte Homes Inc.	2007
NA	Quixtar Inc.	2007
NA	Reston Hospital Center	2007
NA	Rich Products Corp.	2007
NA	Roche Diagnostics	2007
NA	Sacramento Municipal Utility District	2007
NA	Saint Luke's Health System, Inc.	2007
NA	Salvation Army, U.S.A Western Territory	2007
NA	Sanford Health	2007
NA	SAP America Inc.	2007
NA	SAS Institute Inc.	2007
NA	Schwan Food Co.	2007
NA	Scottrade Inc.	2007
NA	Screen Actors Guild-Producers Pension & Health Plans	2007
NA	Securian Financial Group Inc.	2007
NA	Sharp HealthCare	2007
NA	Skanska USA Building Inc.	2007
NA	Solvay Pharmaceuticals Inc.	2007
NA	Southwire Co.	2007
NA	Spiegel Brands Inc.	2007
NA	St. Joseph Health System	2007
NA	St. Jude Children's Research Hospital Inc.	2007
NA	Starz Entertainment Group	2007
NA	Stock Building Supply Inc.	2007
NA	Sutter Health	2007
NA	Swinerton Inc.	2007
NA	Synovus Financial Corp.	2007
NA	Texas Health Resources	2007
NA	Thomson Financial	2007
NA	T-Mobile USA	2007
NA	Towers Perrin	2007
NA	Travelers of New Jersey	2007
NA	UGS Corp.	2007
NA	UniGroup Inc.	2007
NA	Union Bank of California	2007
NA	Univ. of Texas MD Anderson Cancer Center	2007
NA	University of Pittsburgh Medical Center (UPMC)	2007
NA	Vanguard Group	2007
NA	Verizon Business	2007
NA	Verizon Telecom	2007
NA	W.R. Grace	2007
NA	Walt Disney Company	2007
NA	Warner Bros Entertainment Inc.	2007
NA	Webcor Builders Inc.	2007
NA	William Beaumont Hospital	2007
NA	Worldspan LP	2007
101	SAS Institute Inc.	2008
109	Swinerton Inc.	2008
11	Morrison & Foerster LLP	2008
110	Automotive Resources International	2008
112	WinWholesale Inc.	2008
113	Grange Insurance Co.	2008
118	Cincinnati Children's Hospital Medical Center	2008
122	Newmark Knight Frank	2008
129	JM Family Enterprises Inc.	2008
145	Capgemini Group	2008
150	Norton Healthcare Inc.	2008
155	KI	2008
16	Baylor Health Care System	2008
161	Horizon Blue Cross Blue Shield of New Jersey	2008
163	Carolinas HealthCare System	2008
169	Navy Federal Credit Union	2008
172	Sutter Health	2008
173	Blue Cross Blue Shield of North Carolina	2008
174	Quixtar Inc.	2008
179	Skanska U.S.A. Building Inc.	2008
184	CRST International Inc.	2008
186	World Kitchen LLC	2008
188	Arkansas Blue Cross Blue Shield	2008
189	OneAmerica Financial Partners	2008
19	E.&J. Gallo Winery	2008
195	Spiegel Brands Inc.	2008
201	Securian Financial Group Inc.	2008
204	Foley & Lardner LLP	2008
206	Salvation Army U.S.A. Western Territory	2008
211	Pacific Northwest National Laboratory	2008
217	CPS Energy	2008
218	Catholic Healthcare Partners	2008
220	Ansell Healthcare Inc.	2008
221	Webcor Builders Inc.	2008
224	Schneider National Inc.	2008
226	Growmark Inc.	2008
237	Geisinger Health System	2008
238	Poudre Valley Health System	2008
241	Boscov's Department Store LLC	2008
245	Altadis USA Inc.	2008
247	Pulte Homes Inc.	2008
25	PricewaterhouseCoopers LLP	2008
250	Fairview Health Services	2008
26	Maritz Inc.	2008
28	Capital BlueCross	2008
29	Acuity, A Mutual Insurance Co.	2008
3	Highmark Inc.	2008
32	Western Corporate Federal Credit Union (WesCorp)	2008
33	Vanguard Group Inc.	2008
38	Schwan Food Co.	2008
39	Mitsubishi Motors North America Inc.	2008
42	Evanston Northwestern Healthcare	2008
45	Ernst & Young LLP	2008
49	University of Pittsburgh Medical Center (UPMC)	2008
51	Scottrade Inc.	2008
58	Texas Health Resources	2008
6	Southwire Co.	2008
66	UniGroup Inc.	2008
7	Advocate Health Care	2008
73	T-Mobile USA Inc.	2008
76	PHH Arval	2008
78	Travelport GDS	2008
83	Erickson Retirement Communities	2008
84	Gilbane Building Co.	2008
86	Roche Diagnostics Corp.	2008
90	Intermountain Healthcare Inc.	2008
94	Tata Consultancy Services Ltd.	2008
96	Synovus Financial Corp.	2008
NA	Acuity, A Mutual Insurance Co.	2008
NA	Advocate Health Care	2008
NA	Altadis USA Inc.	2008
NA	American Red Cross	2008
NA	American Suzuki Motor Corp.	2008
NA	American Tire Distributors	2008
NA	Amtrak	2008
NA	Ansell Healthcare Inc.	2008
NA	APC by Schneider Electric	2008
NA	Arkansas Blue Cross Blue Shield	2008
NA	Atos Origin Inc.	2008
NA	Austin Energy	2008
NA	Automotive Resources International	2008
NA	Barton Malow Co.	2008
NA	Bayer Corp.	2008
NA	Baylor Health Care System	2008
NA	BDO Seidman LLP	2008
NA	Beth Israel Deaconess Medical Center	2008
NA	Blue Cross Blue Shield of North Carolina	2008
NA	Blue Shield of California	2008
NA	Boscov's Department Store LLC	2008
NA	Capgemini Group	2008
NA	Capital BlueCross	2008
NA	Carolinas HealthCare System	2008
NA	Catholic Healthcare Partners	2008
NA	CCA Global Partners	2008
NA	Chamberlain Group Inc.	2008
NA	Cincinnati Children's Hospital Medical Center	2008
NA	Clarian Heath Partners Inc.	2008
NA	CPS Energy	2008
NA	CRST International Inc.	2008
NA	E.&J. Gallo Winery	2008
NA	Enterprise Rent-A-Car Co.	2008
NA	Erickson Retirement Communities	2008
NA	Ernst & Young LLP	2008
NA	Evanston Northwestern Healthcare	2008
NA	Fairview Health Services	2008
NA	Federal Home Loan Bank of Atlanta	2008
NA	Fidelity Investments	2008
NA	Foley & Lardner LLP	2008
NA	Geisinger Health System	2008
NA	Gilbane Building Co.	2008
NA	Gordon Food Service	2008
NA	Grange Insurance Co.	2008
NA	Growmark Inc.	2008
NA	Haskell Co.	2008
NA	Health Alliance Plan	2008
NA	Highmark Inc.	2008
NA	Horizon Blue Cross Blue Shield of New Jersey	2008
NA	Infor Global Solutions Inc.	2008
NA	Intermountain Healthcare Inc.	2008
NA	Jackson National Life Insurance Co.	2008
NA	JM Family Enterprises Inc.	2008
NA	KI	2008
NA	Lifespan Corp.	2008
NA	M.A. Mortenson Co.	2008
NA	Manheim	2008
NA	Marcus & Millichap	2008
NA	Maritz Inc.	2008
NA	Marshfield Clinic	2008
NA	Messer Construction Co.	2008
NA	Mitsubishi Motors North America Inc.	2008
NA	Mohegan Sun Resort	2008
NA	Morrison & Foerster LLP	2008
NA	Navy Federal Credit Union	2008
NA	NBC Universal Inc.	2008
NA	Nebraska Furniture Mart Inc.	2008
NA	NetApp	2008
NA	Network Services Co.	2008
NA	Newmark Knight Frank	2008
NA	Norton Healthcare, Inc.	2008
NA	OneAmerica Financial Partners	2008
NA	Pacific Northwest National Laboratory	2008
NA	Panalpina Inc.	2008
NA	PHH Arval	2008
NA	Poudre Valley Health System	2008
NA	PricewaterhouseCoopers LLP	2008
NA	Providence Health & Services	2008
NA	Pulte Homes Inc.	2008
NA	Quixtar Inc.	2008
NA	Reston Hospital Center	2008
NA	Roche Diagnostics Corp.	2008
NA	Salvation Army U.S.A. Western Territory	2008
NA	Sanford Health	2008
NA	SAP America Inc.	2008
NA	SAS Institute Inc.	2008
NA	Schneider National, Inc.	2008
NA	Schwan Food Co.	2008
NA	Scottrade Inc.	2008
NA	Securian Financial Group Inc.	2008
NA	SES Americom Inc.	2008
NA	Skanska USA Building Inc.	2008
NA	Solvay Pharmaceuticals Inc.	2008
NA	Southwire Co.	2008
NA	Spiegel Brands Inc.	2008
NA	Starz Entertainment LLC	2008
NA	Stock Building Supply Inc.	2008
NA	Surgical Care Affilates	2008
NA	Sutter Health	2008
NA	Swinerton Inc.	2008
NA	Synovus Financial Corp.	2008
NA	Tata Consultancy Services Ltd.	2008
NA	Teck Cominco Ltd.	2008
NA	Telcordia Technologies	2008
NA	Texas Health Resources	2008
NA	T-Mobile USA Inc.	2008
NA	Travelport GDS	2008
NA	Tyco Electronics	2008
NA	Ullico Inc.	2008
NA	UniGroup Inc.	2008
NA	Union Bank of California N.A.	2008
NA	University of Arkansas for Medical Sciences	2008
NA	University of Pittsburgh Medical Center (UPMC)	2008
NA	Vanguard Group Inc.	2008
NA	Ventura Foods LLC	2008
NA	VP Records	2008
NA	W.R. Grace & Co.	2008
NA	Wachovia Securities LLC	2008
NA	Walt Disney Company	2008
NA	Warner Bros. Entertainment Inc.	2008
NA	Webcor Builders Inc.	2008
NA	Western Corporate Federal Credit Union (WesCorp)	2008
NA	William Beaumont Hospital	2008
NA	WinWholesale, Inc.	2008
NA	World Kitchen LLC	2008
NA	Pinnancle West Capital Corp.	2005	001075
194	Pinnacle West Capital Corp	2007	001075
NA	Pinnacle West Capital Corp	2007	001075
10	Pinnacle West Capital Corp.	2008	001075
NA	Pinnacle West Capital Corp.	2008	001075
NA	Abbott Laboratories	2005	001078
NA	Abbott Laboratories	2006	001078
147	Ace Hardware Corp.	2007	001107
NA	Ace Hardware Corp.	2007	001107
NA	Ace Hardware Corp.	2008	001107
NA	Air Products and Chemicals Inc.	2005	001209
88	Air Products and Chemicals Inc.	2006	001209
NA	Air Products and Chemicals Inc.	2006	001209
134	Air Products & Chemicals Inc.	2007	001209
NA	Air Products & Chemicals Inc.	2007	001209
67	Air Products & Chemicals Inc.	2008	001209
NA	Air Products & Chemicals Inc.	2008	001209
NA	Alcan Inc.	2005	001243
NA	IKON Office Solutions	2007	001246
NA	IKON Office Solutions, Inc.	2008	001246
173	Honeywell International Inc.	2006	001300
NA	Honeywell International Inc.	2006	001300
NA	Alltel Corp.	2005	001318
NA	Alltel Corp.	2006	001318
NA	Alltel Corp.	2007	001318
NA	Alcoa Inc.	2005	001356
NA	Alcoa Inc.	2006	001356
NA	ABM Industries Inc.	2005	001410
163	ABM Industries Inc.	2006	001410
NA	ABM Industries Inc.	2006	001410
249	ABM Industries Inc.	2007	001410
NA	ABM Industries Inc.	2007	001410
147	ABM Industries Inc.	2008	001410
NA	ABM Industries Inc.	2008	001410
NA	American Express Co. .	2006	001447
NA	American Express Co.	2007	001447
NA	Aflac	2005	001449
109	Aflac	2006	001449
NA	Aflac	2006	001449
171	Aflac	2007	001449
NA	Aflac	2007	001449
168	Aflac	2008	001449
NA	Aflac	2008	001449
NA	AG Interactive	2008	001468
NA	Wyeth	2005	001478
86	Wyeth	2006	001478
NA	Wyeth	2006	001478
59	Wyeth	2007	001478
NA	Wyeth	2007	001478
88	Wyeth	2008	001478
NA	Wyeth	2008	001478
NA	American International Group Inc.	2005	001487
149	American International Group Inc.	2006	001487
NA	American International Group Inc.	2006	001487
NA	American International Group Inc.	2007	001487
NA	APL Ltd.	2005	001543
51	APL Limited	2006	001543
NA	APL Limited	2006	001543
NA	APL Limited	2007	001543
NA	APL Limited	2008	001543
NA	Ametek Inc.	2005	001598
NA	Ametek Inc.	2006	001598
NA	Ametek Inc.	2007	001598
NA	Ametek Inc.	2008	001598
NA	Amgen Inc.	2005	001602
NA	Amgen Inc.	2006	001602
NA	AmSouth Bancorp.	2005	001619
133	AmSouth Bancorp.	2006	001619
NA	AmSouth Bancorp.	2006	001619
NA	Anheuser-Busch Cos. Inc.	2007	001663
NA	Apple	2007	001690
NA	Applied Materials Inc.	2005	001704
NA	Applied Materials Inc.	2006	001704
NA	Applied Materials Inc.	2007	001704
120	Applied Materials Inc.	2008	001704
NA	Applied Materials Inc.	2008	001704
NA	Actuant Corporation	2006	001706
159	Actuant Corp.	2007	001706
NA	Actuant Corp.	2007	001706
227	Actuant Corp.	2008	001706
NA	Actuant Corp.	2008	001706
NA	Archer Daniels Midland Co.	2008	001722
NA	Washington Mutual Inc.	2005	001738
54	Washington Mutual Inc.	2006	001738
NA	Washington Mutual Inc.	2006	001738
5	Washington Mutual Inc.	2007	001738
NA	Washington Mutual Inc.	2007	001738
100	Washington Mutual Inc.	2008	001738
NA	Washington Mutual Inc.	2008	001738
36	Arizona Public Service	2006	001742
NA	Arizona Public Service	2006	001742
NA	Arrow Electronics Inc.	2005	001773
37	Arrow Electronics Inc.	2006	001773
NA	Arrow Electronics Inc.	2006	001773
201	Arrow Electronics Inc.	2007	001773
NA	Arrow Electronics Inc.	2007	001773
146	Arrow Electronics Inc.	2008	001773
NA	Arrow Electronics Inc.	2008	001773
NA	Ashland Inc.	2005	001794
NA	Ashland Inc.	2006	001794
NA	Ashland Inc.	2007	001794
NA	AGL Resources Inc.	2007	001837
NA	AGL Resources Inc.	2008	001837
NA	Autodesk Inc.	2008	001878
NA	Automatic Data Processing Inc.	2005	001891
2	Automatic Data Processing Inc.	2006	001891
NA	Automatic Data Processing Inc.	2006	001891
113	Automatic Data Processing Inc.	2007	001891
NA	Automatic Data Processing Inc.	2007	001891
142	Automatic Data Processing Inc.	2008	001891
NA	Automatic Data Processing Inc.	2008	001891
NA	Avery Dennison Corp.	2007	001913
NA	Avnet Inc.	2005	001919
98	Avnet Inc.	2006	001919
NA	Avnet Inc.	2006	001919
68	Avnet Inc.	2007	001919
NA	Avnet Inc.	2007	001919
55	Avnet Inc.	2008	001919
NA	Avnet Inc.	2008	001919
NA	Ball Corp.	2005	001988
NA	Ball Corp.	2006	001988
NA	Ball Corp.	2007	001988
NA	Constellation NewEnergy Inc.	2005	001995
73	Constellation Energy Group Inc.	2006	001995
NA	Constellation Energy Group Inc.	2006	001995
103	Constellation Energy Group Inc.	2007	001995
NA	Constellation Energy Group Inc.	2007	001995
17	Constellation Energy Group Inc.	2008	001995
NA	Constellation Energy Group Inc.	2008	001995
56	Bank of New York Mellon	2007	002019
NA	Bank of New York Mellon	2007	002019
41	Bank of New York Mellon	2008	002019
NA	Bank of New York Mellon	2008	002019
NA	Banta Corp.	2005	002034
NA	Banta Corp.	2006	002034
NA	Applied Industrial Technologies Inc.	2005	002101
26	Applied Industrial Technologies Inc.	2006	002101
NA	Applied Industrial Technologies Inc.	2006	002101
21	Applied Industrial Technologies Inc.	2007	002101
NA	Applied Industrial Technologies Inc.	2007	002101
NA	Applied Industrial Technologies Inc.	2008	002101
NA	BD Biosciences	2005	002111
NA	BD Biosciences	2006	002111
NA	BD Biosciences	2007	002111
NA	BD Biosciences	2008	002111
NA	Verizon Communications	2005	002136
71	Verizon Communications Inc.	2008	002136
NA	Verizon Communications Inc.	2008	002136
NA	BellSouth Corp.	2005	002146
NA	Belo Corp.	2008	002150
NA	McLane Co. Inc.	2005	002176
NA	Black & Decker Corp.	2005	002255
NA	Black & Decker	2006	002255
NA	Black & Decker	2007	002255
NA	H&R Block Inc.	2005	002269
NA	H&R Block Inc	2007	002269
NA	H&R Block Inc.	2008	002269
NA	Blount International Inc.	2008	002271
192	Boeing	2006	002285
NA	Boeing	2006	002285
NA	Boeing	2007	002285
NA	Boeing	2008	002285
NA	Bombardier Aerospace	2005	002297
NA	Booz Allen Hamilton	2005	002314
NA	Booz Allen Hamilton Inc.	2006	002314
NA	AbitibiBowater Inc.	2008	002337
203	Bowne & Co.	2006	002346
NA	Bowne & Co.	2006	002346
NA	Bowne & Co.	2007	002346
185	Bowne & Co.Inc.	2008	002346
NA	Bowne & Co.Inc.	2008	002346
NA	Briggs & Stratton Corp.	2005	002393
NA	Briggs & Stratton Corp.	2006	002393
NA	Bristol-Myers Squibb Co.	2005	002403
NA	Bristol-Myers Squibb Co.	2006	002403
NA	BT Group PLC	2005	002411
NA	BT Group PLC	2006	002411
NA	BT Group PLC	2007	002411
NA	BT Group PLC	2008	002411
NA	Brown-Forman Corp.	2005	002435
234	Brown-Forman Corp.	2006	002435
NA	Brown-Forman Corp.	2006	002435
NA	Brown-Forman Corp.	2007	002435
NA	Brown Shoe Co. Inc.	2006	002436
NA	Burlington Coat Factory Warehouse Corp.	2005	002484
NA	Burlington Coat Factory Warehouse Corp.	2006	002484
NA	Burlington Coat Factory Warehouse Corp.	2007	002484
NA	Burlington Coat Factory Warehouse Corp.	2008	002484
NA	Burlington Northern Santa Fe Corp.	2005	002490
NA	Unisys Corp.	2005	002504
156	Unisys Corp.	2006	002504
NA	Unisys Corp.	2006	002504
199	Unisys Corp.	2007	002504
NA	Unisys Corp.	2007	002504
NA	Unisys Corp.	2008	002504
NA	Acxiom Corp.	2005	002536
120	Acxiom Corp.	2006	002536
NA	Acxiom Corp.	2006	002536
117	Acxiom Corp.	2007	002536
NA	Acxiom Corp.	2007	002536
NA	Acxiom Corp.	2008	002536
NA	CDI Corp.	2005	002538
NA	CDI Corp.	2006	002538
NA	CDI Corp.	2007	002538
NA	CDI Corp.	2008	002538
NA	Cigna Corp.	2005	002547
17	Cigna Corp.	2006	002547
NA	Cigna Corp.	2006	002547
229	Cigna Corp.	2007	002547
NA	Cigna Corp.	2007	002547
192	Cigna Corp.	2008	002547
NA	Cigna Corp.	2008	002547
NA	CNA Financial Corp.	2005	002558
44	CNA Financial Corp.	2006	002558
NA	CNA Financial Corp.	2006	002558
250	CNA Financial Corp.	2007	002558
NA	CNA Financial Corp.	2007	002558
70	CNA Financial Corp.	2008	002558
NA	CNA Financial Corp.	2008	002558
NA	CSX Corp.	2005	002574
55	CSX Corp.	2006	002574
NA	CSX Corp.	2006	002574
NA	Cardinal Health Inc.	2005	002751
NA	Progress Energy Inc.	2005	002783
50	Progress Energy	2008	002783
NA	Progress Energy	2008	002783
NA	Centex Homes	2005	002845
NA	CenturyTel Inc.	2007	002884
NA	CenturyTel Inc.	2008	002884
NA	Charming Shoppes Inc.	2008	002938
NA	Magellan Health Services Inc.	2005	002940
NA	Chevron Information Technology Co.	2006	002991
72	Chevron Corp.	2007	002991
NA	Chevron Corp.	2007	002991
NA	Chubb Corp.	2005	003024
NA	Chubb Corp.	2006	003024
NA	Chubb Corp.	2007	003024
NA	Chubb Corp.	2008	003024
NA	Cintas Corp.	2005	003062
NA	Cintas Corporation	2007	003062
NA	Cintas Corp.	2008	003062
NA	Clayton Homes Inc.	2005	003103
208	Clayton Homes Inc	2006	003103
NA	Clayton Homes Inc	2006	003103
126	Clayton Homes Inc	2007	003103
NA	Clayton Homes Inc	2007	003103
198	Clayton Homes Inc.	2008	003103
NA	Clayton Homes Inc.	2008	003103
NA	Coca-Cola Co.	2005	003144
111	Coca-Cola Enterprises Inc.	2008	003144
NA	Coca-Cola Enterprises Inc.	2008	003144
NA	Colgate-Palmolive Co.	2005	003170
155	Colgate-Palmolive Co.	2006	003170
NA	Colgate-Palmolive Co.	2006	003170
NA	Hewitt Associates LLC	2005	003221
NA	Aon Corp.	2006	003221
NA	Aon Corp.	2007	003221
NA	Aon Corp.	2008	003221
NA	Comerica Inc.	2008	003231
NA	Citibank	2005	003243
NA	Cendant Corp.	2005	003278
NA	Computer Associates International Inc.	2005	003310
101	CA Inc.	2006	003310
NA	CA Inc.	2006	003310
182	CA Inc.	2007	003310
NA	CA Inc.	2007	003310
NA	CA Inc.	2008	003310
90	Computer Sciences Corp.	2007	003336
NA	Computer Sciences Corp.	2007	003336
NA	Consolidated Edison Inc.	2005	003413
NA	CNF Inc.	2005	003416
28	Con-way Inc.	2006	003416
NA	Con-way Inc.	2006	003416
1	Con-way Inc.	2007	003416
NA	Con-way Inc.	2007	003416
72	Con-way Inc.	2008	003416
NA	Con-way Inc.	2008	003416
244	Molson Coors Brewing Co.	2006	003505
NA	Molson Coors Brewing Co.	2006	003505
NA	Corning Inc.	2005	003532
15	Corning Inc.	2006	003532
NA	Corning Inc.	2006	003532
NA	Brookfield Homes Corp.	2005	003550
167	Countrywide Financial Corp.	2006	003555
NA	Countrywide Financial Corp.	2006	003555
242	Countrywide Financial Corp.	2007	003555
NA	Countrywide Financial Corp.	2007	003555
NA	Cummins Inc.	2005	003650
202	Cummins Inc.	2006	003650
NA	Cummins Inc.	2006	003650
189	Cummins Inc.	2007	003650
NA	Cummins Inc.	2007	003650
NA	DST Systems Inc.	2006	003707
NA	DST Systems Inc.	2007	003707
NA	Dana Corp.	2005	003734
NA	Dana Corp.	2006	003734
NA	Dana Corp.	2007	003734
NA	Danaher Corp.	2005	003735
NA	Deere & Co.	2005	003835
232	Deere & Co.	2006	003835
NA	Deere & Co.	2006	003835
NA	Deere & Co.	2007	003835
106	Deere & Co.	2008	003835
NA	Deere & Co.	2008	003835
NA	Delta Air Lines Inc.	2005	003851
NA	Delta Air Lines Inc.	2007	003851
119	Delta Air Lines Inc.	2008	003851
NA	Delta Air Lines Inc.	2008	003851
NA	DTE Energy Co.	2005	003897
141	DTE Energy Co.	2006	003897
NA	DTE Energy Co.	2006	003897
164	DTE Energy Co.	2007	003897
NA	DTE Energy Co.	2007	003897
137	DTE Energy Co.	2008	003897
NA	DTE Energy Co.	2008	003897
NA	Alliance One International Inc.	2005	003937
184	Alliance One International Inc.	2006	003937
NA	Alliance One International Inc.	2006	003937
110	Alliance One International Inc.	2007	003937
NA	Alliance One International Inc.	2007	003937
NA	Alliance One International Inc.	2008	003937
NA	Diebold Inc.	2008	003946
164	Walt Disney Parks and Resorts LLC	2006	003980
NA	Walt Disney Parks and Resorts LLC	2006	003980
NA	Dominion Resources, Inc.	2006	004029
NA	Dominion Resources Inc.	2007	004029
NA	Dominion Resources Inc.	2008	004029
158	Dow Chemical Co.	2006	004036
NA	Dow Chemical Co.	2006	004036
96	Dow Chemical Co.	2007	004036
NA	Donaldson Co. Inc.	2007	004036
NA	Dow Chemical Co.	2007	004036
166	Dow Chemical Co.	2008	004036
NA	Dow Chemical Co.	2008	004036
NA	R.R. Donnelley & Sons Co.	2005	004040
53	R.R. Donnelley & Sons Co.	2006	004040
NA	R.R. Donnelley & Sons Co.	2006	004040
209	R.R. Donnelley & Sons Co.	2007	004040
NA	Banta Corp. (Acquired by R.R. Donnelley)	2007	004040
NA	R.R. Donnelley & Sons Co.	2007	004040
103	R.R. Donnelley & Sons Co.	2008	004040
NA	R.R. Donnelley & Sons Co.	2008	004040
108	Flowserve Corp.	2006	004108
NA	Flowserve Corp.	2006	004108
NA	Flowserve Corporation	2007	004108
NA	Flowserve Corp.	2008	004108
NA	Eastman Kodak Co.	2005	004194
159	Eastman Kodak Co.	2006	004194
NA	Eastman Kodak Co.	2006	004194
NA	Eastman Kodak Co.	2007	004194
34	Eaton Corp.	2008	004199
NA	Eaton Corp.	2008	004199
NA	A.G. Edwards & Sons Inc.	2005	004230
134	A.G. Edwards & Sons Inc.	2006	004230
NA	A.G. Edwards & Sons Inc.	2006	004230
19	A.G. Edwards & Sons Inc.	2007	004230
NA	A.G. Edwards & Sons Inc.	2007	004230
30	Emerson	2007	004321
NA	Emerson	2007	004321
117	Emerson	2008	004321
NA	Emerson	2008	004321
NA	Engelhard Corp.	2005	004371
NA	Engelhard Corp.	2006	004371
46	Atmos Energy Corp.	2008	004383
NA	Atmos Energy Corp.	2008	004383
NA	Equifax Inc.	2005	004423
35	Equifax Inc.	2006	004423
NA	Equifax Inc.	2006	004423
241	Equifax Inc.	2007	004423
NA	Equifax Inc.	2007	004423
160	Equifax Inc.	2008	004423
NA	Equifax Inc.	2008	004423
NA	Ericsson Inc.	2005	004439
NA	Exxon Mobil Corp.	2007	004503
NA	Exxon Mobil Corp.	2008	004503
NA	Farmers Insurance Group	2005	004581
NA	FedEx Corp.	2005	004598
25	FedEx Corp.	2006	004598
NA	FedEx Corp.	2006	004598
132	FedEx Corp.	2007	004598
NA	FedEx Corp.	2007	004598
18	FedEx Corp.	2008	004598
NA	FedEx Corp.	2008	004598
NA	Federal-Mogul Corp.	2005	004600
232	Fannie Mae	2008	004601
NA	Fannie Mae	2008	004601
80	Federal Signal Corp.	2008	004608
NA	Federal Signal Corp.	2008	004608
NA	Fifth Third Bancorp.	2005	004640
NA	Fifth Third Bancorp.	2006	004640
NA	Fifth Third Bancorp.	2007	004640
NA	Fifth Third Bancorp	2008	004640
NA	Regions Financial Corp.	2005	004674
NA	Regions Financial Corp.	2006	004674
51	Regions Financial	2007	004674
NA	Regions Financial	2007	004674
NA	Regions Financial Corp.	2008	004674
NA	First American Corp.	2005	004679
NA	First American Corp	2006	004679
NA	First American Corp	2007	004679
71	U.S. Bancorp	2006	004682
NA	U.S. Bancorp	2006	004682
NA	M&T Bank Corp.	2005	004699
NA	M&T Bank Corp.	2006	004699
NA	M&T Bank Corp.	2007	004699
229	M&T Bank Corp.	2008	004699
NA	M&T Bank Corp.	2008	004699
NA	First Horizon National Corp.	2005	004737
135	First Horizon National Corp	2006	004737
NA	First Horizon National Corp	2006	004737
143	First Horizon National Corp	2007	004737
NA	First Horizon National Corp	2007	004737
240	First Horizon National Corp	2008	004737
NA	First Horizon National Corp	2008	004737
NA	Wachovia Corp.	2005	004739
97	Wachovia Corp.	2006	004739
NA	Wachovia Corp.	2006	004739
13	Wachovia Corp.	2007	004739
NA	Wachovia Corp.	2007	004739
NA	Wachovia Corp.	2008	004739
NA	Fleetwood Enterprises Inc.	2006	004768
NA	Fleetwood Enterprises Inc.	2007	004768
NA	Fleetwood Enterprises Inc.	2008	004768
NA	Florida Power & Light	2007	004798
NA	Fluor Corp.	2005	004818
146	Fluor Corp.	2006	004818
NA	Fluor Corp.	2006	004818
212	Fluor Corp.	2007	004818
NA	Fluor Corp.	2007	004818
NA	Fluor Corp.	2008	004818
NA	Forest Laboratories Inc.	2008	004843
NA	GATX Corp.	2005	004941
NA	GATX Corp.	2006	004941
180	GATX Corp.	2007	004941
NA	GATX Corp.	2007	004941
NA	GATX Corp.	2008	004941
242	Geico	2008	004946
NA	Geico	2008	004946
NA	Arthur J. Gallagher & Co.	2006	004973
152	Gannett Co. Inc.	2006	004988
NA	Gannett Co. Inc.	2006	004988
NA	Gannett Co. Inc.	2007	004988
NA	Gap Inc.	2005	004990
NA	Gap Inc.	2006	004990
NA	Gap Inc.	2007	004990
NA	Genentech Inc.	2005	005020
NA	Genentech, Inc.	2006	005020
NA	General Dynamics Corp.	2005	005046
NA	General Dynamics Corp.	2006	005046
NA	GE Aircraft Engines	2006	005047
NA	GE Aircraft Engines	2007	005047
NA	General Mills Inc.	2005	005071
NA	General Mills Inc.	2006	005071
NA	General Mills Inc.	2007	005071
NA	General Mills Inc.	2008	005071
NA	General Motors Acceptance Corp.	2005	005072
221	EDS Corp.	2006	005074
NA	EDS Corp.	2006	005074
175	EDS Corp.	2007	005074
NA	EDS Corp.	2007	005074
123	EDS Corp.	2008	005074
NA	EDS Corp.	2008	005074
NA	SPX Corp.	2005	005087
216	SPX Corp.	2006	005087
NA	SPX Corp.	2006	005087
NA	SPX Corp.	2007	005087
NA	SPX Corp.	2008	005087
NA	Genuine Parts Co.	2005	005125
105	Genuine Parts Co.	2006	005125
NA	Genuine Parts Co.	2006	005125
77	Genuine Parts Co.	2007	005125
NA	Genuine Parts Co.	2007	005125
140	Genuine Parts Co.	2008	005125
NA	Genuine Parts Co.	2008	005125
NA	Georgia-Pacific Corp.	2005	005134
NA	Georgia-Pacific Corp.	2006	005134
NA	Georgia-Pacific Corp.	2007	005134
NA	GlaxoSmithKline PLC	2005	005180
NA	GlaxoSmithKline PLC	2006	005180
NA	Goodrich Corp.	2007	005229
NA	Goodrich Corp.	2008	005229
NA	Graybar Electric Co. Inc.	2005	005288
NA	Graybar Electric Co. Inc.	2006	005288
88	Graybar Electric Co. Inc.	2007	005288
NA	Graybar Electric Co. Inc.	2007	005288
157	Graybar Electric Co.Inc.	2008	005288
NA	Graybar Electric Co.Inc.	2008	005288
39	Halliburton Co.	2006	005439
NA	Halliburton Co.	2006	005439
114	Halliburton Co.	2007	005439
NA	Halliburton Co.	2007	005439
NA	Halliburton Co.	2008	005439
NA	Hannaford Bros. Co	2006	005465
NA	Hannaford Bros. Co	2007	005465
NA	The Harris Corp.	2005	005492
30	The Harris Corp.	2006	005492
NA	The Harris Corp.	2006	005492
108	Harris Corp.	2007	005492
NA	Harris Corp.	2007	005492
165	Harris Corp.	2008	005492
NA	Harris Corp.	2008	005492
NA	Hasbro Inc.	2006	005518
NA	Hasbro Inc.	2007	005518
NA	Hershey Co.	2007	005597
NA	Hershey Co.	2008	005597
20	Hewlett-Packard Co.	2006	005606
NA	Hewlett-Packard Co.	2006	005606
28	Hewlett-Packard Co.	2007	005606
NA	Hewlett-Packard Co.	2007	005606
87	Hewlett-Packard Co.	2008	005606
NA	Hewlett-Packard Co.	2008	005606
NA	Hillenbrand Industries Inc.	2006	005639
NA	Hillenbrand Industries Inc.	2007	005639
NA	Hill-Rom Holdings, Inc.	2008	005639
NA	Hilton Hotels Corp.	2005	005643
100	Hilton Hotels Corp.	2006	005643
NA	Hilton Hotels Corp.	2006	005643
78	Hilton Hotels Corp.	2007	005643
NA	Hilton Hotels Corp.	2007	005643
2	Hilton Hotels Corp.	2008	005643
NA	Hilton Hotels Corp.	2008	005643
NA	Hitachi Data Systems Corp.	2007	005650
NA	Hitachi Data Systems Corp.	2008	005650
NA	HNI Corp.	2005	005690
NA	American Honda Motor Co. Inc.	2005	005691
NA	American Honda Motor Corp	2006	005691
NA	Starwood Hotels & Resorts Worldwide Inc.	2005	005723
NA	Centerpoint Energy Inc.	2005	005742
180	J. B. Hunt Transport Services Inc.	2006	005783
NA	J. B. Hunt Transport Services Inc.	2006	005783
NA	J. B. Hunt Transport Services Inc.	2007	005783
NA	J.B. Hunt Transport Services Inc.	2008	005783
NA	Huntington Bancshares Inc.	2008	005786
NA	ITT Corp.	2006	005860
NA	ITT Corp.	2007	005860
NA	Illinois Tool Works Inc.	2005	005878
NA	Ingersoll-Rand Co.Ltd.	2006	005959
NA	Intel Corp.	2005	006008
NA	Intel Corp.	2006	006008
NA	Intergraph Corp.	2007	006036
57	Intergraph Corp.	2008	006036
NA	Intergraph Corp.	2008	006036
NA	International Business Machines Corp.	2005	006066
82	International Business Machines Corp.	2006	006066
NA	International Business Machines Corp.	2006	006066
24	International Business Machines Corp.	2007	006066
NA	International Business Machines Corp.	2007	006066
205	International Business Machines Corp.	2008	006066
NA	International Business Machines Corp.	2008	006066
NA	International Truck & Engine Corp.	2005	006081
5	International Truck and Engine Corp.	2006	006081
NA	International Truck and Engine Corp.	2006	006081
NA	International Truck & Engine Corp.	2007	006081
NA	International Truck & Engine Corp.	2008	006081
NA	IGT	2006	006097
NA	International Paper Co.	2005	006104
NA	International Rectifier Corp.	2005	006109
NA	International Rectifier Corp.	2006	006109
NA	International Rectifier Corp.	2007	006109
NA	International Rectifier Corp.	2008	006109
227	International Speedway Corp.	2007	006116
NA	International Speedway Corp.	2007	006116
NA	International Speedway Corp.	2008	006116
NA	Emcor Group Inc.	2005	006223
230	Emcor Group Inc.	2006	006223
NA	Emcor Group Inc.	2006	006223
53	Emcor Group Inc.	2007	006223
NA	Emcor Group Inc.	2007	006223
191	Emcor Group Inc.	2008	006223
NA	Emcor Group Inc.	2008	006223
NA	Smurfit-Stone Container Corp.	2005	006242
222	Smurfit-Stone Container Corp.	2006	006242
NA	Smurfit-Stone Container Corp.	2006	006242
NA	Johnson & Johnson	2005	006266
NA	Johnson & Johnson	2006	006266
NA	Johnson & Johnson	2007	006266
NA	Johnson & Johnson Inc.	2008	006266
NA	Johnson Controls Inc.	2007	006268
NA	KLA-Tencor Corp.	2008	006304
NA	Great Plains Energy Inc.	2005	006334
NA	Westar Energy Inc.	2007	006338
NA	Westar Energy Inc.	2008	006338
204	Keane Inc	2006	006362
NA	Keane Inc	2006	006362
170	Keane Inc.	2007	006362
NA	Keane Inc.	2007	006362
NA	Keane Inc.	2008	006362
NA	Kelly Services Inc.	2005	006379
NA	Kelly Services, Inc.	2007	006379
NA	Kennametal	2008	006386
NA	Kimball International Inc.	2005	006433
250	Kimball International Inc.	2006	006433
NA	Kimball International Inc.	2006	006433
243	Kimball International Inc.	2007	006433
NA	Kimball International Inc.	2007	006433
78	Kimberly-Clark Corp.	2006	006435
NA	Kimberly-Clark Corp.	2006	006435
4	Kimberly-Clark Corp.	2007	006435
NA	Kimberly-Clark Corp.	2007	006435
138	Kimberly-Clark Corp.	2008	006435
NA	Kimberly-Clark Corp.	2008	006435
NA	LSI Corp.	2007	006529
NA	LSI Corp.	2008	006529
NA	Lafarge North America Inc.	2005	006552
NA	Leggett & Platt Inc.	2005	006649
239	Leggett & Platt Inc.	2006	006649
NA	Leggett & Platt Inc.	2006	006649
239	Leggett & Platt Inc.	2007	006649
NA	Leggett & Platt Inc.	2007	006649
NA	Leggett & Platt Inc.	2008	006649
NA	Lennar Corp.	2008	006669
NA	Eli Lilly and Co.	2005	006730
102	Eli Lilly and Co.	2006	006730
NA	Eli Lilly and Co.	2006	006730
50	Eli Lilly & Co.	2007	006730
NA	Eli Lilly & Co.	2007	006730
92	Eli Lilly & Co.	2008	006730
NA	Eli Lilly & Co.	2008	006730
NA	Liz Claiborne Inc.	2005	006768
148	Liz Claiborne Inc.	2006	006768
NA	Liz Claiborne Inc.	2006	006768
NA	Liz Claiborne Inc.	2007	006768
NA	Liz Claiborne Inc.	2008	006768
NA	Lockheed Martin Corp.	2005	006774
NA	Lockheed Martin Corp.	2007	006774
NA	Lockheed Martin Corp.	2008	006774
NA	KeySpan Corp.	2007	006799
NA	Louisiana-Pacific Corp.	2005	006821
107	LP Building Products	2006	006821
NA	LP Building Products	2006	006821
112	LP Building Products	2007	006821
NA	LP Building Products	2007	006821
149	LP Building Products	2008	006821
NA	LP Building Products	2008	006821
243	Lowe's Companies Inc.	2006	006829
NA	Lowe's Companies Inc.	2006	006829
94	Lowe's Companies Inc.	2007	006829
NA	Lowe's Companies Inc.	2007	006829
NA	Lowe's Companies Inc.	2008	006829
NA	Lubrizol Corp.	2005	006830
106	Lubrizol Corp.	2006	006830
NA	Lubrizol Corp.	2006	006830
130	Lubrizol Corp.	2007	006830
NA	Lubrizol Corp.	2007	006830
40	Lubrizol Corp.	2008	006830
NA	Lubrizol Corp.	2008	006830
NA	M.D.C. Holdings Inc.	2007	006865
NA	M.D.C. Holdings Inc.	2008	006865
NA	Marathon Oil Corp.	2007	007017
NA	Marathon Oil Corp.	2008	007017
NA	Marsh Inc.	2005	007065
NA	Metaldyne Corp.	2005	007086
NA	Mattel Inc.	2008	007116
NA	May Dept. Store Co.	2005	007127
NA	Maytag Corp.	2005	007139
NA	McCormick & Co. Inc.	2006	007146
133	McCormick & Co. Inc.	2007	007146
NA	McCormick & Co. Inc.	2007	007146
NA	McCormick & Co.Inc.	2008	007146
NA	McGraw-Hill Cos. Inc.	2005	007163
NA	McGraw-Hill Co. Inc.	2006	007163
200	McGraw-Hill Co. Inc.	2007	007163
NA	McGraw-Hill Co. Inc.	2007	007163
159	McGraw-Hill Co.Inc.	2008	007163
NA	McGraw-Hill Co.Inc.	2008	007163
NA	McKesson Corp.	2005	007171
NA	Medco Health Solutions Inc.	2005	007186
NA	Medco Health Solutions Inc.	2006	007186
NA	Medline Industries Inc.	2005	007224
197	Medline Industries Inc.	2006	007224
NA	Medline Industries Inc.	2006	007224
214	Medline Industries Inc.	2007	007224
NA	Medline Industries Inc.	2007	007224
NA	Medline Industries Inc.	2008	007224
NA	Medtronic Inc.	2007	007228
NA	Medtronic Inc.	2008	007228
NA	Mellon Financial Corp.	2005	007238
22	Mellon Financial Corp.	2006	007238
NA	Mellon Financial Corp.	2006	007238
104	Mentor Graphics Corp.	2008	007251
NA	Mentor Graphics Corp.	2008	007251
NA	Merck & Co. Inc.	2005	007257
NA	Schering-Plough Corp.	2005	007257
NA	Merck & Co. Inc.	2006	007257
NA	Merck & Co. Inc.	2007	007257
NA	Schering-Plough	2007	007257
NA	Merck & Co. Inc.	2008	007257
NA	Schering-Plough Corp.	2008	007257
NA	Meredith Corp.	2008	007260
NA	Merrill Lynch & Co. Inc.	2007	007267
NA	Merrill Lynch & Co. Inc.	2008	007267
NA	Micron Technology Inc.	2005	007343
NA	Micron Technology Inc.	2006	007343
NA	Micron Technology Inc.	2007	007343
NA	Entergy Corp.	2005	007366
186	Entergy Corp.	2006	007366
NA	Entergy Corp.	2006	007366
121	Entergy Corp.	2007	007366
NA	Entergy Corp.	2007	007366
244	Entergy Corp.	2008	007366
NA	Entergy Corp.	2008	007366
NA	Herman Miller Inc.	2005	007401
60	Herman Miller Inc.	2006	007401
NA	Herman Miller Inc.	2006	007401
149	Herman Miller Inc.	2007	007401
NA	Herman Miller Inc.	2007	007401
239	Herman Miller Inc.	2008	007401
NA	Herman Miller Inc.	2008	007401
NA	Molex Inc.	2005	007506
NA	Molex Inc.	2006	007506
NA	Motorola Inc.	2005	007585
12	Motorola Inc.	2006	007585
NA	Motorola Inc.	2006	007585
20	Motorola Inc.	2007	007585
NA	Motorola Inc.	2007	007585
20	Motorola Inc.	2008	007585
NA	Motorola Inc.	2008	007585
NA	Bank of America Corp.	2005	007647
NA	Bank of America Corp.	2006	007647
NA	Bank of America Corp.	2007	007647
NA	Bank of America Corp.	2008	007647
NA	NCR Corp.	2005	007648
NA	NEC Solutions Inc.	2005	007652
NA	Northwest Airlines Corp.	2005	007672
NA	Tenet Healthcare Corp.	2007	007750
NA	Tenet Healthcare Corp.	2008	007750
NA	NPC International Inc.	2005	007761
NA	NPC International Inc.	2006	007761
NA	National Semiconductor Corp.	2005	007772
87	National Semiconductor Corp.	2006	007772
NA	National Semiconductor Corp.	2006	007772
2	National Semiconductor Corp.	2007	007772
NA	National Semiconductor Corp.	2007	007772
1	National Semiconductor Corp.	2008	007772
NA	National Semiconductor Corp.	2008	007772
NA	New York Times Co.	2005	007866
16	The New York Times Co.	2006	007866
NA	The New York Times Co.	2006	007866
34	New York Times Co.	2007	007866
NA	New York Times Co.	2007	007866
175	New York Times Co.	2008	007866
NA	New York Times Co.	2008	007866
NA	Newell Rubbermaid Inc.	2005	007875
NA	Newell Rubbermaid Inc.	2006	007875
NA	Newell Rubbermaid Inc.	2007	007875
NA	Nordson Corp.	2008	007921
NA	Norfolk Southern Corp.	2007	007923
NA	Norfolk Southern Corp.	2008	007923
NA	Xcel Energy Inc.	2005	007977
8	Xcel Energy Inc.	2006	007977
NA	Xcel Energy Inc.	2006	007977
135	Xcel Energy Inc.	2007	007977
NA	Xcel Energy Inc.	2007	007977
NA	Xcel Energy Inc.	2008	007977
136	Nortel Networks Corp.	2006	007980
NA	Nortel Networks Corp.	2006	007980
225	Nortel Networks Corp.	2008	007980
NA	Nortel Networks Corp.	2008	007980
NA	Northern Trust Corp.	2005	007982
42	Northern Trust Corp.	2006	007982
NA	Northern Trust Corp.	2006	007982
93	Northern Trust Corp.	2007	007982
NA	Northern Trust Corp.	2007	007982
12	Northern Trust Corp.	2008	007982
NA	Northern Trust Corp.	2008	007982
NA	Northrop Grumman Corp.	2005	007985
123	Northrop Grumman Corp.	2006	007985
NA	Northrop Grumman Corp.	2006	007985
245	Northrop Grumman Corp.	2007	007985
NA	Northrop Grumman Corp.	2007	007985
197	Northrop Grumman Corp.	2008	007985
NA	Northrop Grumman Corp.	2008	007985
NA	NorthWestern Energy Corp.	2007	008001
NA	NorthWestern Energy Corp.	2008	008001
74	Wells Fargo & Co.	2008	008007
NA	Wells Fargo & Co.	2008	008007
NA	Occidental Petroleum Corp.	2005	008068
111	Occidental Petroleum Corp.	2006	008068
NA	Occidental Petroleum Corp.	2006	008068
193	Occidental Petroleum Corp.	2008	008068
NA	Occidental Petroleum Corp.	2008	008068
NA	Ogilvy & Mather Worldwide	2005	008094
161	Ogilvy & Mather Worldwide	2006	008094
NA	Ogilvy & Mather Worldwide	2006	008094
208	Ogilvy & Mather Worldwide	2007	008094
NA	Ogilvy & Mather Worldwide	2007	008094
134	Ogilvy & Mather Worldwide	2008	008094
NA	Ogilvy & Mather Worldwide	2008	008094
NA	Olin Corp.	2005	008123
NA	Olin Corp.	2006	008124
NA	Owens Corning	2005	008214
62	Owens Corning	2006	008214
NA	Owens Corning	2006	008214
NA	Owens Corning	2007	008214
248	Owens Corning	2008	008214
NA	Owens Corning	2008	008214
153	PHH Corp.	2006	008240
NA	PHH Corp.	2006	008240
NA	PHH Corp.	2007	008240
NA	PNC Financial Services Group	2005	008245
162	PNC Financial Services Group Inc.	2006	008245
NA	PNC Financial Services Group Inc.	2006	008245
99	PNC Financial Services Group Inc.	2007	008245
NA	PNC Financial Services Group Inc.	2007	008245
60	PNC Financial Services Group Inc.	2008	008245
NA	PNC Financial Services Group Inc.	2008	008245
NA	PPG Industries Inc.	2005	008247
114	PPG Industries	2008	008247
NA	PPG Industries	2008	008247
NA	Paccar Inc.	2005	008253
174	Paccar Inc.	2006	008253
NA	Paccar Inc.	2006	008253
89	Paccar Inc.	2007	008253
NA	Paccar Inc.	2007	008253
124	Paccar Inc.	2008	008253
NA	Paccar Inc.	2008	008253
176	Sempra Energy	2008	008272
NA	Sempra Energy	2008	008272
NA	PacifiCorp	2005	008290
143	PacifiCorp	2008	008290
NA	PacifiCorp	2008	008290
NA	Parker Hannifin Corp.	2005	008358
68	Parker Hannifin Corp.	2006	008358
NA	Parker Hannifin Corp.	2006	008358
12	Parker Hannifin Corp.	2007	008358
NA	Parker Hannifin Corp.	2007	008358
209	Parker Hannifin Corp.	2008	008358
NA	Parker Hannifin Corp.	2008	008358
NA	Parsons Corp.	2005	008367
63	Parsons Corp.	2006	008367
NA	Parsons Corp.	2006	008367
138	Parsons Corp.	2007	008367
NA	Parsons Corp.	2007	008367
126	Parsons Corp.	2008	008367
NA	Parsons Corp.	2008	008367
NA	Paychex Inc.	2005	008402
242	Paychex Inc.	2006	008402
NA	Paychex Inc.	2006	008402
198	Paychex Inc.	2007	008402
NA	Paychex Inc.	2007	008402
233	Paychex Inc.	2008	008402
NA	Paychex Inc.	2008	008402
NA	J.C. Penney Co. Inc.	2005	008446
NA	J. C. Penney Company, Inc	2006	008446
NA	PPL Corp	2006	008455
NA	Kinder Morgan Inc.	2007	008467
NA	Kinder Morgan Inc.	2008	008467
NA	Peoples Energy	2005	008470
NA	Applied Biosystems Group	2005	008488
NA	Pfizer Inc.	2005	008530
21	Pfizer Inc.	2006	008530
NA	Pfizer Inc.	2006	008530
NA	Pfizer Inc.	2007	008530
NA	Exelon Corp.	2005	008539
56	Exelon Corp.	2006	008539
NA	Exelon Corp.	2006	008539
146	Exelon Corp.	2007	008539
NA	Exelon Corp.	2007	008539
135	Exelon Corp.	2008	008539
NA	Exelon Corp.	2008	008539
NA	Philips Electronics NA Corp.	2005	008546
NA	Pioneer Hi-Bred International Inc.	2005	008596
NA	Pioneer Hi-Bred International Inc.	2006	008596
NA	Pitney Bowes Inc.	2005	008606
NA	Pitney Bowes Inc.	2006	008606
NA	Pitney Bowes Inc.	2007	008606
NA	The Procter & Gamble Company	2006	008762
105	Procter & Gamble Co.	2008	008762
NA	Procter & Gamble Co.	2008	008762
171	The Progressive Group of Insurance Companies	2008	008781
NA	The Progressive Group of Insurance Cos.	2008	008781
NA	PSEG Inc.	2006	008810
NA	PSEG Inc.	2007	008810
29	Raytheon Co.	2006	008972
NA	Raytheon Co.	2006	008972
NA	Raytheon Co.	2007	008972
182	Raytheon Co.	2008	008972
NA	Raytheon Co.	2008	008972
NA	Reuters Group PLC	2005	009098
NA	Reuters	2007	009098
NA	Thomson Reuters	2008	009098
NA	Reynolds & Reynolds	2005	009112
66	Reynolds & Reynolds Co.	2006	009112
NA	Reynolds & Reynolds Co.	2006	009112
NA	Reynolds & Reynolds Co.	2007	009112
NA	Ricoh Corp.	2005	009135
179	Ricoh Corp.	2006	009135
NA	Ricoh Corp.	2006	009135
144	Ricoh Corp.	2007	009135
NA	Ricoh Corp.	2007	009135
82	Ricoh Corp.	2008	009135
NA	Ricoh Corp.	2008	009135
NA	Ryder System Inc.	2005	009299
41	Ryder System Inc.	2006	009299
NA	Ryder System Inc.	2006	009299
25	Ryder System Inc.	2007	009299
NA	Ryder System Inc.	2007	009299
81	Ryder System Inc.	2008	009299
NA	Ryder System Inc.	2008	009299
NA	St Jude Children's Research Hospital Inc.	2005	009372
NA	Schlumberger Limited	2007	009465
NA	Schlumberger Limited	2008	009465
NA	Science Application International Corp.	2005	009480
193	Science Applications International Corp.	2006	009480
NA	Science Applications International Corp.	2006	009480
NA	Science Applications International Corp.	2007	009480
NA	Scientific Atlantic Inc.	2005	009483
NA	Scientific Atlanta Inc.	2006	009483
NA	Sears Roebuck & Co.	2005	009563
NA	Tyco Fire and Security	2006	009602
NA	Tyco Fire & Security	2007	009602
NA	Shaklee Corp.	2005	009631
NA	Shaw Industries Inc.	2005	009643
NA	The Sherwin-Williams Co.	2005	009667
NA	The Sherwin-Williams Company	2006	009667
NA	Sherwin-Williams Company	2007	009667
NA	Sherwin-Williams Co.	2008	009667
124	Sierra Health Services Inc.	2006	009689
NA	Sierra Health Services Inc.	2006	009689
151	Sierra Health Services Inc.	2007	009689
NA	Sierra Health Services Inc.	2007	009689
NA	Sigma-Aldrich Co.	2005	009699
NA	Sigma-Aldrich Corp.	2006	009699
NA	Simon & Schuster Inc.	2005	009738
NA	Simon & Schuster Inc.	2006	009738
NA	Simon & Schuster Inc.	2007	009738
138	Smith International Inc.	2006	009772
NA	Smith International Inc.	2006	009772
NA	Smith International Inc.	2007	009772
65	Smith International Inc.	2008	009772
NA	Smith International Inc.	2008	009772
NA	Sonoco Products Co.	2005	009815
NA	Sonoco Products Co.	2006	009815
NA	Sonoco Products Co.	2007	009815
NA	Sonoco Products Co.	2008	009815
NA	Sony Electronics Inc.	2005	009818
NA	Sony Electronics Inc.	2006	009818
NA	Sony Electronics Inc.	2007	009818
NA	Sony Electronics Inc.	2008	009818
NA	Edison International	2005	009846
NA	Southern Co.	2005	009850
144	Southern Co.	2006	009850
NA	Southern Co.	2006	009850
58	Southern Co.	2007	009850
NA	Southern Co.	2007	009850
181	Southern Co.	2008	009850
NA	Southern Co.	2008	009850
24	Southern Union Co.	2008	009867
NA	Southern Union Co.	2008	009867
NA	Southwest Airlines Co.	2005	009882
199	Southwest Airlines Co.	2008	009882
31	Southwest Airlines Co.	2007	009883
NA	Southwest Airlines Co.	2008	009883
NA	Southwest Airlines Co.	2007	009884
NA	AT&T	2005	009899
NA	SBC Communications Inc.	2005	009899
207	AT&T Inc.	2006	009899
NA	AT&T Inc.	2006	009899
NA	AT&T Services Inc.	2007	009899
NA	AT&T Services Inc.	2008	009899
NA	Standard Register	2005	010005
58	The Standard Register Co.	2006	010005
NA	The Standard Register Co.	2006	010005
6	Standard Register Co.	2007	010005
NA	Standard Register Co.	2007	010005
61	Standard Register Co.	2008	010005
NA	Standard Register Co.	2008	010005
NA	Standex International Corp.	2006	010008
NA	Standex International Corp.	2007	010008
NA	State Street Corp.	2005	010035
33	State Street Corp.	2006	010035
NA	State Street Corp.	2006	010035
82	State Street Corp.	2007	010035
NA	State Street Corp.	2007	010035
62	State Street Corp.	2008	010035
NA	State Street Corp.	2008	010035
NA	SLM Corp.	2005	010121
76	SLM Corp.	2006	010121
NA	SLM Corp.	2006	010121
NA	SLM Corp.	2007	010121
NA	Suntrust Banks Inc.	2005	010187
NA	Suntrust Banks Inc.	2007	010187
NA	Supervalu Inc.	2007	010190
223	Surgical Care Affilates	2008	010208
NA	Symbol Technologies Inc.	2006	010232
NA	Sysco Corporation	2007	010247
NA	TECO Energy Inc.	2007	010277
NA	TECO Energy Inc.	2008	010277
NA	Tektronix Inc.	2006	010391
NA	Tektronix Inc.	2007	010391
NA	Tektronix Inc.	2008	010391
NA	Teleflex Inc.	2007	010407
NA	Teleflex Incorporated	2008	010407
NA	Tennessee Valley Authority	2005	010447
191	Tennessee Valley Authority	2006	010447
NA	Tennessee Valley Authority	2006	010447
183	Tennessee Valley Authority	2007	010447
NA	Tennessee Valley Authority	2007	010447
NA	Tennessee Valley Authority	2008	010447
NA	Teradyne Inc.	2005	010453
NA	Continental Airlines Inc.	2005	010484
241	Continental Airlines Inc.	2006	010484
NA	Continental Airlines Inc.	2006	010484
NA	Continental Airlines Inc.	2007	010484
108	Continental Airlines Inc.	2008	010484
NA	Continental Airlines Inc.	2008	010484
NA	Texas Instruments Inc.	2005	010499
NA	Texas Instruments Inc.	2006	010499
NA	Texas Instruments Inc.	2007	010499
217	Textron Inc.	2006	010519
NA	Textron Inc.	2006	010519
NA	Textron Inc.	2007	010519
139	Textron Inc.	2008	010519
NA	Textron Inc.	2008	010519
NA	Thermo Fisher Scientific	2007	010530
NA	Thermo Fisher Scientific	2008	010530
NA	3Com Corp.	2005	010553
NA	Torchmark Corp.	2007	010614
NA	Torchmark Corp.	2008	010614
NA	Total System Services Inc.	2005	010631
NA	Total System Services Inc.	2006	010631
NA	Turner Broadcasting System Inc.	2005	010769
NA	Tyco International Ltd.	2005	010787
178	Tyson Foods Inc.	2008	010793
NA	Tyson Foods, Inc.	2008	010793
NA	UOP LLC	2005	010811
NA	URS Corp.	2008	010813
NA	USG Corp.	2005	010816
90	Unifi Inc.	2006	010839
NA	Unifi Inc.	2006	010839
91	Unifi Inc.	2007	010839
NA	Unifi Inc.	2007	010839
NA	Unifi Inc.	2008	010839
NA	Ameren Corp.	2005	010860
NA	Ameren Corp.	2006	010860
230	Ameren Corp.	2007	010860
NA	Ameren Corp.	2007	010860
36	Ameren Corp.	2008	010860
NA	Ameren Corp.	2008	010860
NA	Ingenix Inc.	2005	010903
NA	Ingenix, Inc.	2006	010903
186	Ingenix, Inc.	2007	010903
NA	Ingenix, Inc.	2007	010903
NA	UnitedHealth Group Inc.	2007	010903
NA	Ingenix Inc.	2008	010903
NA	UnitedHealth Group Inc.	2008	010903
NA	UPS Inc.	2005	010920
237	UPS Inc.	2006	010920
NA	UPS Inc.	2006	010920
NA	UPS Inc.	2007	010920
207	UPS Inc.	2008	010920
NA	UPS Inc.	2008	010920
NA	United Technologies Corp.	2005	010983
79	United Technologies Corp.	2006	010983
NA	United Technologies Corp.	2006	010983
103	Sprint Nextel Corp.	2006	010984
NA	Sprint Nextel Corp.	2006	010984
187	Sprint Nextel Corp.	2007	010984
NA	Sprint Nextel Corp.	2007	010984
89	Sprint Nextel Corp.	2008	010984
NA	Sprint Nextel Corp.	2008	010984
NA	Universal Health Services Inc.	2005	011032
NA	Unocal Corp.	2005	011038
NA	VF Corp.	2005	011060
235	VF Corp.	2006	011060
NA	VF Corp.	2006	011060
247	VF Corp.	2007	011060
NA	VF Corp.	2007	011060
246	VF Corp.	2008	011060
NA	VF Corp.	2008	011060
200	Valmont Industries Inc.	2008	011094
NA	Valmont Industries Inc.	2008	011094
NA	Valspar Corp.	2008	011096
NA	Vishay Intertechnology Inc.	2005	011191
NA	Volt Information Sciences Inc.	2005	011213
74	Volt Information Sciences Inc.	2006	011213
NA	Volt Information Sciences Inc.	2006	011213
37	Volt Information Sciences Inc.	2007	011213
NA	Volt Information Sciences Inc.	2007	011213
21	Volt Information Sciences Inc.	2008	011213
NA	Volt Information Sciences Inc.	2008	011213
NA	Wal-Mart Stores Inc.	2006	011259
NA	Walgreen Co.	2005	011264
NA	Wendy's International Inc.	2005	011366
NA	Wendy's International	2006	011366
NA	Western Digital Corp.	2005	011399
NA	Western Digital Corp	2007	011399
NA	Western Digital Corp.	2008	011399
NA	MeadWestvaco Corp.	2005	011446
206	MeadWestvaco Corp.	2006	011446
NA	MeadWestvaco Corp.	2006	011446
NA	Whitney Holding Corp.	2008	011482
NA	Integrys Energy Group Inc.	2008	011555
NA	Xerox Corp.	2005	011636
185	Xerox Corp.	2006	011636
NA	Xerox Corp.	2006	011636
139	Xerox Corp.	2007	011636
NA	Xerox Corp.	2007	011636
151	Xerox Corp.	2008	011636
NA	Xerox Corp.	2008	011636
NA	Yellow Roadway Corp.	2005	011649
196	YRC Worldwide Inc.	2006	011649
NA	YRC Worldwide Inc.	2006	011649
NA	YRC Worldwide Inc.	2007	011649
180	YRC Worldwide Inc.	2008	011649
NA	YRC Worldwide Inc.	2008	011649
NA	Bear, Stearns Cos. Inc.	2005	011818
NA	Bear, Stearns & Cos. Inc.	2006	011818
NA	Bear, Stearns & Cos. Inc.	2007	011818
NA	CompuCom Systems Inc.	2005	011867
246	CompuCom Systems Inc.	2006	011867
NA	CompuCom Systems Inc.	2006	011867
NA	CompuCom Systems Inc.	2007	011867
NA	CompuCom Systems Inc.	2008	011867
NA	Anadarko Petroleum Corp.	2007	011923
NA	Anadarko Petroleum Corp.	2008	011923
NA	EMC Corp.	2005	012053
201	EMC Corp.	2006	012053
NA	EMC Corp.	2006	012053
179	EMC Corp.	2007	012053
NA	EMC Corp.	2007	012053
208	EMC Corp.	2008	012053
NA	EMC Corp.	2008	012053
NA	Morgan Stanley	2007	012124
NA	Morgan Stanley	2008	012124
NA	Pacificare Health Systems Inc.	2005	012126
NA	PacifiCare Health System Inc.	2006	012126
NA	Sun Microsystems Inc.	2005	012136
6	Sun Microsystems Inc.	2006	012136
NA	Sun Microsystems Inc.	2006	012136
119	Sun Microsystems Inc.	2007	012136
NA	Sun Microsystems Inc.	2007	012136
NA	Sun Microsystems Inc.	2008	012136
165	T. Rowe Price Group Inc.	2006	012138
NA	T. Rowe Price Group Inc.	2006	012138
10	T. Rowe Price Group Inc.	2007	012138
NA	T. Rowe Price Group Inc.	2007	012138
107	T. Rowe Price Group Inc.	2008	012138
NA	T. Rowe Price Group Inc.	2008	012138
NA	Microsoft Corp.	2005	012141
27	Microsoft Corp.	2007	012141
NA	Microsoft Corp.	2007	012141
95	Microsoft Corp.	2008	012141
NA	Microsoft Corp.	2008	012141
NA	Oracle Corp	2006	012142
NA	Oracle Corporation	2007	012142
NA	Sungard Data System Inc.	2005	012144
NA	SunGard Data Systems	2006	012144
NA	SunGard Data Systems	2007	012144
NA	Genzyme Corp.	2007	012233
NA	Genzyme Corp.	2008	012233
131	BNSF Railway Co. Inc.	2006	012312
NA	BNSF Railway Co. Inc.	2006	012312
150	BNSF Railway Co. Inc.	2007	012312
NA	BNSF Railway Co. Inc.	2007	012312
164	BNSF Railway Co. Inc.	2008	012312
NA	BNSF Railway Co.Inc.	2008	012312
NA	Adobe Systems Inc.	2006	012540
NA	Adobe Systems	2007	012540
NA	Adobe Systems Inc.	2008	012540
NA	News America	2006	012579
NA	Fiserv Inc	2007	012635
4	Fiserv Inc.	2008	012635
NA	Fiserv Inc.	2008	012635
5	Unum Group	2008	012726
NA	Unum Group	2008	012726
NA	Hanson Aggregates NA	2005	012826
NA	Airgas Inc.	2005	012950
NA	Airgas Inc	2007	012950
NA	Synovus Financial Corp.	2006	013041
NA	Fidelity National Financial Inc.	2006	013114
NA	British Airways PLC	2005	013145
NA	Conair Corp.	2005	013148
NA	Progressive Casualty Insurance Co.	2005	013341
200	Progressive Casualty Insurance Co.	2006	013341
NA	Progressive Casualty Insurance Co.	2006	013341
36	Progressive Casualty Insurance Co.	2007	013341
NA	Progressive Casualty Insurance Co.	2007	013341
NA	Audiovox Corporation	2008	013354
130	GCI	2006	013375
NA	GCI	2006	013375
NA	GCI (General Communication Inc.)	2007	013375
NA	GCI (General Communication Inc.)	2008	013375
NA	Saks Inc.	2005	013380
NA	Saks Inc.	2006	013380
240	Saks Inc.	2007	013380
NA	Saks Inc.	2007	013380
249	Saks Inc.	2008	013380
NA	Saks Inc.	2008	013380
NA	Cadence Design Systems Inc.	2005	013421
13	Cadence Design Systems Inc.	2006	013421
NA	Cadence Design Systems Inc.	2006	013421
52	Cadence Design Systems Inc.	2007	013421
NA	Cadence Design Systems Inc.	2007	013421
243	Cadence Design Systems Inc.	2008	013421
NA	Cadence Design Systems Inc.	2008	013421
NA	Midamerican Energy Holding Co.	2005	013427
NA	MidAmerican Energy Holdings Co.	2006	013427
177	Level 3 Communications Inc.	2008	013440
NA	Level 3 Communications Inc.	2008	013440
NA	QVC Inc.	2005	013506
70	QVC Inc.	2006	013506
NA	QVC Inc.	2006	013506
79	QVC Inc.	2007	013506
NA	QVC Inc.	2007	013506
NA	QVC Inc.	2008	013506
NA	Tiffany & Co.	2005	013646
52	Tiffany & Co.	2006	013646
NA	Tiffany & Co.	2006	013646
63	Tiffany & Co.	2007	013646
NA	Tiffany & Co.	2007	013646
214	Tiffany & Co.	2008	013646
NA	Tiffany & Co.	2008	013646
227	CBS Corp	2006	013714
NA	CBS Corp	2006	013714
NA	CBS Corp.	2007	013714
NA	CBS Corp.	2008	013714
NA	Fair Isaac Corp.	2005	013824
233	Fair Isaac Corp.	2006	013824
NA	Fair Isaac Corp.	2006	013824
NA	Fair Isaac Corp.	2007	013824
158	Fair Isaac Corp.	2008	013824
NA	Fair Isaac Corp.	2008	013824
NA	Charles Schwab & Co.	2005	013988
NA	Charles Schwab & Co	2006	013988
NA	CCL Industries Inc.	2005	014062
NA	CCL Industries Inc.	2006	014062
NA	CCL Industries Inc.	2007	014062
NA	CCL Industries Inc.	2008	014062
NA	Manpower Inc.	2005	014370
NA	Respironics Inc.	2008	014385
NA	TransAlta	2005	014391
92	TransAlta Corp.	2006	014391
NA	TransAlta Corp.	2006	014391
NA	MGM Mirage	2005	014418
NA	MGM Mirage	2006	014418
NA	MGM Mirage	2007	014418
99	MGM Mirage	2008	014418
NA	MGM Mirage	2008	014418
NA	Flying J Inc.	2005	014444
NA	Flying J Inc.	2006	014444
NA	Flying J Inc.	2007	014444
222	Flying J Inc.	2008	014444
NA	Flying J Inc.	2008	014444
NA	Cognos Inc.	2006	014459
74	Cognos Inc.	2007	014459
NA	Cognos Inc.	2007	014459
NA	Waste Management Inc.	2005	014477
NA	Waste Management Inc.	2006	014477
176	Waste Management Inc.	2007	014477
NA	Waste Management Inc.	2007	014477
63	Waste Management Inc.	2008	014477
NA	Waste Management Inc.	2008	014477
NA	Dell Inc.	2005	014489
40	Dell Inc.	2006	014489
NA	Dell Inc.	2006	014489
95	Dell Inc.	2007	014489
NA	Dell Inc.	2007	014489
NA	Dell Inc.	2008	014489
NA	Imperial Sugar Co.	2005	014503
NA	American Power Conversion Corp.	2005	014565
3	American Power Conversion Corp.	2006	014565
NA	American Power Conversion Corp.	2006	014565
NA	American Power Conversion Corp.	2007	014565
NA	BMC Software Inc.	2005	014650
65	BMC Software Inc.	2006	014650
NA	BMC Software Inc.	2006	014650
NA	BMC Software Inc.	2007	014650
NA	BMC Software Inc.	2008	014650
NA	Babson Capital Management	2006	014739
NA	Babson Capital Management	2007	014739
NA	Babson Capital Management LLC	2008	014739
NA	Arch Coal Inc.	2006	014793
206	Arch Coal Inc.	2007	014793
NA	Arch Coal Inc.	2007	014793
190	Arch Coal Inc.	2008	014793
NA	Arch Coal Inc.	2008	014793
NA	Cincinnati Financial Corp.	2005	014824
219	Cincinnati Financial Corp.	2006	014824
NA	Cincinnati Financial Corp.	2006	014824
207	Cincinnati Financial Corp.	2007	014824
NA	Cincinnati Financial Corp.	2007	014824
NA	Cincinnati Financial Corp.	2008	014824
NA	Ohio Casualty Group	2005	014827
119	Ohio Casualty Group	2006	014827
NA	Ohio Casualty Group	2006	014827
193	Ohio Casualty Group	2007	014827
NA	Ohio Casualty Group	2007	014827
NA	Ohio Casualty	2008	014827
NA	Duracell	2005	014890
NA	Southern California Edison Co.	2006	014912
NA	Beckman Coulter Inc.	2005	015106
NA	Beckman Coulter Inc.	2007	015106
NA	Beckman Coulter Inc.	2008	015106
145	IDEX Corp.	2006	015267
NA	IDEX Corp.	2006	015267
NA	IDEX Corp.	2007	015267
NA	IDEX Corp.	2008	015267
NA	Alaris Medical Systems Inc.	2005	015315
NA	Alaris Medical Systems Inc.	2006	015315
NA	Akzo Nobel	2005	015334
NA	Mueller Industries Inc.	2007	015343
NA	Mueller Industries Inc.	2008	015343
166	ABF Freight System Inc.	2006	015456
NA	ABF Freight System Inc.	2006	015456
224	ABF Freight System Inc.	2007	015456
NA	ABF Freight System Inc.	2007	015456
202	ABF Freight System Inc.	2008	015456
NA	ABF Freight System Inc.	2008	015456
NA	HSBC NA Holdings Inc.	2005	015509
[truncated: 751 more rows]

## Sheet: note
Ranking	Year 2006-2008: top 250 with rankings; 'NA' means ranking between 251 and 500. Year 2005: top 500 without ranking; 'NA' means ranking between 1 and 500.
