# Supplementary material for: Social Learning in Information Technology Investment: The Role of Board Interlocks
Source: Atypon-hosted journal article supplement (doi:10.1287/mnsc.2019.3548), 2020-07-30
Supplement: mnsc.2019.3548.sm2.pdf [file mnsc.2019.3548.sm2.pdf]

# Social Learning in Information Technology Investment: The Role of Board Interlocks

Zhuo (June) Cheng  
School of Accounting and Finance, The Hong Kong Polytechnic University  
Hong Kong, China  
E-mail: zhuo.cheng@polyu.edu.hk

Arun Rai  
Center for Digital Innovation and Department of Computer Information Systems, Robinson College of  
Business, Georgia State University  
Atlanta, GA 30303  
E-mail: arunrai@gsu.edu

Feng Tian  
School of Accounting and Finance, The Hong Kong Polytechnic University  
Hong Kong, China  
E-mail: feng.a.tian@polyu.edu.hk

Sean Xin Xu  
Research Center for Contemporary Management, Key Research Institute of Humanities and Social  
Sciences at Universities, School of Economics and Management, Tsinghua University  
Beijing, China  
E-mail: xuxin@sem.tsinghua.edu.cn

## Online Appendix Part A: Additional Tables

Table A1: Variables

| Variable                                          |                    | Description (data source)                                                                                                                                                                            | Obs.  | Mean  | S.D.  |
|---------------------------------------------------|--------------------|------------------------------------------------------------------------------------------------------------------------------------------------------------------------------------------------------|-------|-------|-------|
| <b>Board interlock influence on IT investment</b> |                    |                                                                                                                                                                                                      |       |       |       |
| <i>IT</i>                                         | <i>CRM&amp;SCM</i> | <i>CRM&amp;SCM applications, total number of users using CRM and SCM applications, scaled by number of employees (CI &amp; Compustat)</i>                                                            | 1,950 | 0.012 | 0.022 |
|                                                   | <i>IT Labor</i>    | <i>IT labor expense, in \$ thousand, scaled by number of employees (CI &amp; Compustat)</i>                                                                                                          | 1,950 | 0.953 | 1.723 |
| <i>AvgIT_InterlockFirm</i>                        | <i>CRM&amp;SCM</i> | <i>Average CRM&amp;SCM applications (or IT labor expense) of the focal firm's interlocked firms</i>                                                                                                  | 1,950 | 0.012 | 0.016 |
|                                                   | <i>IT Labor</i>    |                                                                                                                                                                                                      | 1,950 | 0.911 | 1.242 |
| <i>MatchedInterlockIT</i>                         | <i>CRM&amp;SCM</i> | <i>Average CRM&amp;SCM applications (or IT labor expense) of size-matched firms, matched—by closest total assets in the same 2-digit SIC industry—for each interlocked firm (CI &amp; Compustat)</i> | 1,950 | 0.012 | 0.016 |
|                                                   | <i>IT Labor</i>    |                                                                                                                                                                                                      | 1,950 | 0.930 | 1.214 |
| <i>NeighborhoodIT</i>                             | <i>CRM&amp;SCM</i> | <i>Average CRM&amp;SCM applications (or IT labor expense) of firms within 100km of the focal firm, excluding its interlocked firms (CI &amp; Compustat)</i>                                          | 1,806 | 0.013 | 0.012 |
|                                                   | <i>IT Labor</i>    |                                                                                                                                                                                                      | 1,806 | 0.989 | 0.969 |
| <i>IndustryIT</i>                                 | <i>CRM&amp;SCM</i> | <i>Lagged median industry CRM&amp;SCM applications (or IT labor expense)</i>                                                                                                                         | 1,950 | 0.004 | 0.005 |
|                                                   | <i>IT Labor</i>    |                                                                                                                                                                                                      | 1,950 | 0.319 | 0.412 |

| Variable                       | Description (data source)                                                                                                                                                                   | Obs.  | Mean  | S.D.  |
|--------------------------------|---------------------------------------------------------------------------------------------------------------------------------------------------------------------------------------------|-------|-------|-------|
| #Meetings High                 | 1 if number of board meetings is greater than or equal to industry median, and 0 otherwise (SEC Edgar)                                                                                      | 1,950 | 0.651 | 0.477 |
| #Meetings Low                  | 1 if number of board meetings is lower than industry median, and 0 otherwise (SEC Edgar)                                                                                                    | 1,950 | 0.349 | 0.477 |
| #InterlockFirm                 | Number of interlocked firms for each focal firm (RiskMetrics)                                                                                                                               | 1,950 | 6.751 | 4.161 |
| Ln(#InterlockFirm)             | Natural logarithm of (1+#InterlockFirm) (RiskMetrics)                                                                                                                                       | 1,950 | 1.903 | 0.553 |
| AvgIWRank_InterlockFirm        | Average IW rank of interlocked firms; an interlocked firm is coded 2 if ranked in top 250, 1 if ranked 251–500, and 0 if not ranked (InformationWeek website)                               | 974   | 0.543 | 0.399 |
| CR4                            | 4-firm industry concentration ratio at the 4-digit SIC level (Compustat-Segment)                                                                                                            | 1,950 | 0.785 | 0.218 |
| Uncertainty                    | Standard deviation of earnings for the past five years; earnings are deflated by total assets (Compustat)                                                                                   | 1,950 | 0.033 | 0.042 |
| Diversification                | Firm diversification of asset allocation across reported segments using Herfindahl index (Compustat-Segment)                                                                                | 1,950 | 0.582 | 0.294 |
| AdjustedROA                    | Adjusted Return on Assets; moving average firm ROA of t-2 to t minus the median industry(SIC 2) moving average ROA of t-2 to t (Compustat)                                                  | 1,950 | 0.048 | 0.082 |
| Leverage                       | Leverage ratio measured as long-term debt / total assets; moving average of t-2 to t (Compustat)                                                                                            | 1,950 | 0.203 | 0.130 |
| Growth                         | Year-to-year percentage change in sales; moving average of t-2 to t (Compustat)                                                                                                             | 1,950 | 0.082 | 0.135 |
| Auto                           | 1 for firms in “automate industries”; 0 otherwise; classification based on Chatterjee et al. (2001) and Anderson et al. (2006)’s studies                                                    | 1,950 | 0.376 | 0.485 |
| Trans                          | 1 for firms in “transform industries”; 0 otherwise                                                                                                                                          | 1,950 | 0.120 | 0.325 |
| HighTech                       | 1 if the primary industry is: Drugs (SIC 2833-2836), R&D Services (8731-8734), Programming (7371-7379), Computers (3570-3577), or Electronics (3600-3674)                                   | 1,950 | 0.088 | 0.283 |
| MonitorIntensive               | 1 if a majority of independent directors serve on at least two of the three principal monitoring committees (i.e., audit, compensation, and nominating/governance committees) (RiskMetrics) | 1,950 | 0.490 | 0.500 |
| IndependentDirector            | 1 if percentage of independent directors on the focal firm’s board is greater than or equal to 50%; 0 otherwise (RiskMetrics)                                                               | 1,950 | 0.965 | 0.184 |
| CEO_Duality                    | 1 if CEO is also chairman of the board; 0 otherwise (RiskMetrics)                                                                                                                           | 1,950 | 0.637 | 0.481 |
| <b>Performance implication</b> |                                                                                                                                                                                             |       |       |       |
| TobinsQ                        | Tobin’s Q, the ratio of the market value of the firm to the book value of assets at the end of year t (Compustat)                                                                           | 1,800 | 1.281 | 0.977 |
| IndustryQ                      | Average Tobin’s Q in the 2-digit SIC industry                                                                                                                                               | 1,950 | 1.086 | 0.495 |
| MarketShare                    | Market share in a 2-digit SIC industry (Compustat)                                                                                                                                          | 1,950 | 0.273 | 0.281 |
| PPE                            | Property, plant, and equipment (PP&E) intensity, measured as the amount of PP&E scaled by total assets (Compustat)                                                                          | 1,950 | 0.284 | 0.212 |
| R&D                            | R&D intensity, measured as research and development expense scaled by total assets (Compustat)                                                                                              | 1,950 | 0.017 | 0.033 |
| Adv                            | Advertising intensity, measure as advertising expense                                                                                                                                       | 1,950 | 0.012 | 0.031 |

| Variable                          |                     | Description (data source)                                                                                                                                                                                       | Obs.  | Mean  | S.D.  |
|-----------------------------------|---------------------|-----------------------------------------------------------------------------------------------------------------------------------------------------------------------------------------------------------------|-------|-------|-------|
|                                   |                     | <i>scaled by total assets (Compustat)</i>                                                                                                                                                                       |       |       |       |
| Size                              |                     | <i>Natural logarithm of market value of equity (Compustat)</i>                                                                                                                                                  | 1,950 | 8.074 | 1.436 |
| InterlockDrivenIT                 | CRM&SCM             | <i>Interlock-driven IT investment, defined by Equation (2); it is the proportion of the focal firm's CRM&amp;SCM applications (or IT labor expense) predicted by the average</i>                                | 974   | 1.047 | 0.240 |
|                                   | IT Labor            | <i>CRM&amp;SCM applications (or IT labor expense) of the focal firm's interlocked firms</i>                                                                                                                     | 974   | 1.047 | 0.240 |
| ResidualIT                        | CRM&SCM             | <i>Residual IT investment, which equals a firm's CRM&amp;SCM applications (or IT labor expense) less InterlockDriven</i>                                                                                        | 974   | 0.001 | 1.754 |
|                                   | IT Labor            | <i>CRM&amp;SCM applications (or IT labor expense), defined by Equation (3)</i>                                                                                                                                  | 974   | 0.001 | 1.754 |
| <b>Robustness tests</b>           |                     |                                                                                                                                                                                                                 |       |       |       |
| AvgIT_Newly_InterlockFirm         | CRM&SCM             | <i>Average CRM&amp;SCM applications (or IT labor expense) of newly interlocked firms, defined as interlocked firms that</i>                                                                                     | 1,950 | 0.003 | 0.011 |
|                                   | IT Labor            | <i>have never been interlocked with the focal firm before</i>                                                                                                                                                   | 1,950 | 0.216 | 0.816 |
| AvgIT_Existing_InterlockFirm      | CRM&SCM             | <i>Average CRM&amp;SCM applications (or IT labor expense) of interlocked firms that are not newly interlocked (i.e.,</i>                                                                                        | 1,950 | 0.010 | 0.015 |
|                                   | IT Labor            | <i>existing interlocked firms)</i>                                                                                                                                                                              | 1,950 | 0.800 | 1.194 |
| AvgIT_Firm_Left_Interlock_1stYear | CRM&SCM             | <i>Average CRM&amp;SCM applications (or IT labor expense) of firms that were interlocked with the focal firm but have</i>                                                                                       | 1,950 | 0.004 | 0.013 |
|                                   | IT Labor            | <i>not been for 1 year</i>                                                                                                                                                                                      | 1,950 | 0.291 | 0.973 |
| AvgIT_Firm_Left_Interlock_2ndYear | CRM&SCM             | <i>Average CRM&amp;SCM applications (or IT labor expense) of firms that were interlocked with the focal firm but have</i>                                                                                       | 1,950 | 0.004 | 0.011 |
|                                   | IT Labor            | <i>not been for 2 years</i>                                                                                                                                                                                     | 1,950 | 0.290 | 0.885 |
| AvgIT_Firm_Left_Interlock_3rdYear | CRM&SCM             | <i>Average CRM&amp;SCM applications (or IT labor expense) of firms that were interlocked with the focal firm but have</i>                                                                                       | 1,950 | 0.004 | 0.011 |
|                                   | IT Labor            | <i>not been for 3 or more years</i>                                                                                                                                                                             | 1,950 | 0.281 | 0.864 |
| #ExistingInterlockFirm            |                     | <i>Number of interlocked firms that are not newly interlocked (i.e., existing interlocked firms) (RiskMetrics)</i>                                                                                              | 1,950 | 6.751 | 4.161 |
| Ln(#ExistingInterlockFirm)        |                     | <i>Natural logarithm of (1+#ExistingInterlockFirm) (RiskMetrics)</i>                                                                                                                                            | 1,950 | 1.903 | 0.553 |
| IT                                | IT hardware capital | <i>IT hardware capital, scaled by total assets (Harte-Hanks Computer Intelligence (CI) database)</i>                                                                                                            | 1,950 | 0.003 | 0.003 |
| AvgIT_InterlockFirm               | IT hardware capital | <i>Average IT hardware capital of the focal firm's interlocked firms.</i>                                                                                                                                       | 1,950 | 0.003 | 0.002 |
| InterlockDrivenIT                 | IT hardware capital | <i>Interlock-driven IT investment, defined by Equation (2); it is the proportion of the focal firm's IT hardware capital predicted by the average IT hardware capital of the focal firm's interlocked firms</i> | 974   | 0.003 | 0.000 |
| ResidualIT                        | IT hardware capital | <i>Residual IT investment, which equals a firm's IT hardware capital less InterlockDriven IT hardware capital, defined by Equation (3)</i>                                                                      | 974   | 0.000 | 0.003 |
| Interlock_IT_Industry_Experience  |                     | <i>1 if any interlocked directors have working experience in IT industries; 0 otherwise (SEC proxy filings and RiskMetrics)</i>                                                                                 | 1,882 | 0.089 | 0.285 |
| InterlockCEO                      |                     | <i>1 if any interlocked directors are CEOs of interlocked firms; 0 otherwise (SEC proxy filings and RiskMetrics)</i>                                                                                            | 1,882 | 0.398 | 0.490 |

Table A2: Correlation Matrix

Panel A: Correlation of Major Variables (IT=CRM&SCM)

|                                | 1      | 2      | 3      | 4      | 5      | 6      | 7      | 8      | 9      | 10     | 11     | 12     | 13     | 14     | 15     | 16     | 17     | 18     | 19     | 20     | 21     | 22     | 23    | 24    |  |
|--------------------------------|--------|--------|--------|--------|--------|--------|--------|--------|--------|--------|--------|--------|--------|--------|--------|--------|--------|--------|--------|--------|--------|--------|-------|-------|--|
| <i>IT</i>                      |        |        |        |        |        |        |        |        |        |        |        |        |        |        |        |        |        |        |        |        |        |        |       |       |  |
| <i>AvgIT_InterlockFirm</i>     | 0.100  |        |        |        |        |        |        |        |        |        |        |        |        |        |        |        |        |        |        |        |        |        |       |       |  |
| <i>MatchedInterlockIT</i>      | -0.070 | -0.018 |        |        |        |        |        |        |        |        |        |        |        |        |        |        |        |        |        |        |        |        |       |       |  |
| <i>NeighborhoodIT</i>          | 0.110  | -0.028 | -0.003 |        |        |        |        |        |        |        |        |        |        |        |        |        |        |        |        |        |        |        |       |       |  |
| <i>log(#InterlockFirms)</i>    | -0.070 | -0.066 | 0.009  | -0.062 |        |        |        |        |        |        |        |        |        |        |        |        |        |        |        |        |        |        |       |       |  |
| <i>AvgIWRank_InterlockFirm</i> | 0.038  | -0.073 | 0.003  | 0.146  | 0.259  |        |        |        |        |        |        |        |        |        |        |        |        |        |        |        |        |        |       |       |  |
| <i>CR4</i>                     | -0.218 | 0.036  | 0.068  | -0.077 | 0.101  | 0.082  |        |        |        |        |        |        |        |        |        |        |        |        |        |        |        |        |       |       |  |
| <i>Uncertainty</i>             | 0.041  | -0.062 | 0.000  | 0.008  | -0.084 | 0.034  | 0.011  |        |        |        |        |        |        |        |        |        |        |        |        |        |        |        |       |       |  |
| <i>Diversification</i>         | 0.083  | -0.023 | -0.009 | -0.034 | -0.285 | -0.080 | -0.076 | 0.025  |        |        |        |        |        |        |        |        |        |        |        |        |        |        |       |       |  |
| <i>AdjustedROA</i>             | -0.057 | -0.062 | 0.029  | 0.046  | 0.037  | -0.017 | 0.166  | -0.094 | -0.061 |        |        |        |        |        |        |        |        |        |        |        |        |        |       |       |  |
| <i>Leverage</i>                | 0.080  | -0.078 | 0.057  | 0.035  | 0.065  | 0.011  | -0.253 | -0.066 | -0.078 | -0.212 |        |        |        |        |        |        |        |        |        |        |        |        |       |       |  |
| <i>Growth</i>                  | -0.137 | -0.024 | 0.027  | 0.034  | -0.066 | -0.003 | 0.081  | 0.052  | 0.025  | 0.167  | -0.107 |        |        |        |        |        |        |        |        |        |        |        |       |       |  |
| <i>Auto</i>                    | 0.066  | -0.072 | -0.053 | 0.054  | 0.023  | -0.059 | -0.251 | -0.011 | -0.026 | -0.284 | 0.216  | 0.034  |        |        |        |        |        |        |        |        |        |        |       |       |  |
| <i>Trans</i>                   | 0.140  | 0.093  | 0.009  | 0.034  | -0.071 | 0.004  | -0.027 | 0.122  | 0.046  | 0.016  | -0.087 | -0.061 | -0.258 |        |        |        |        |        |        |        |        |        |       |       |  |
| <i>HighTech</i>                | 0.019  | -0.021 | -0.041 | 0.023  | 0.010  | -0.040 | -0.016 | 0.085  | 0.082  | 0.108  | -0.028 | 0.012  | -0.189 | 0.076  |        |        |        |        |        |        |        |        |       |       |  |
| <i>IndustryIT</i>              | 0.196  | 0.051  | 0.052  | 0.025  | 0.070  | 0.103  | -0.113 | 0.045  | -0.063 | -0.038 | 0.081  | 0.025  | 0.022  | 0.024  | -0.087 |        |        |        |        |        |        |        |       |       |  |
| <i>Tobin's Q</i>               | 0.016  | -0.007 | 0.046  | 0.029  | 0.012  | 0.103  | 0.107  | 0.023  | 0.117  | 0.455  | -0.201 | 0.137  | -0.136 | 0.067  | 0.064  | -0.042 |        |        |        |        |        |        |       |       |  |
| <i>InterlockDrivenIT</i>       | 0.134  | 0.862  | -0.001 | 0.033  | -0.022 | 0.220  | 0.053  | -0.051 | -0.020 | -0.060 | -0.080 | -0.007 | -0.082 | 0.104  | -0.035 | 0.098  | 0.029  |        |        |        |        |        |       |       |  |
| <i>ResidualIT</i>              | 0.993  | -0.006 | -0.071 | 0.107  | -0.068 | 0.011  | -0.227 | 0.047  | 0.086  | -0.050 | 0.091  | -0.138 | 0.076  | 0.128  | 0.024  | 0.185  | 0.012  | 0.012  |        |        |        |        |       |       |  |
| <i>IndustryQ</i>               | -0.103 | 0.064  | 0.075  | 0.041  | 0.013  | 0.066  | 0.327  | 0.073  | -0.041 | 0.447  | -0.167 | 0.095  | -0.287 | 0.118  | 0.188  | -0.059 | 0.327  | 0.073  | -0.113 |        |        |        |       |       |  |
| <i>MarketShare</i>             | -0.179 | -0.026 | 0.114  | -0.041 | 0.149  | 0.108  | 0.612  | -0.114 | -0.056 | 0.061  | -0.062 | -0.032 | -0.027 | -0.071 | -0.091 | -0.105 | 0.056  | 0.000  | -0.180 | 0.092  |        |        |       |       |  |
| <i>PPE</i>                     | 0.030  | -0.049 | -0.032 | 0.103  | -0.008 | -0.031 | -0.393 | -0.110 | 0.082  | -0.131 | 0.332  | 0.032  | 0.397  | -0.255 | -0.188 | 0.029  | -0.120 | -0.058 | 0.037  | -0.209 | -0.120 |        |       |       |  |
| <i>RD</i>                      | -0.007 | -0.060 | -0.054 | -0.013 | 0.005  | 0.010  | -0.017 | 0.242  | 0.120  | 0.150  | -0.198 | -0.022 | -0.119 | -0.111 | 0.432  | -0.042 | 0.201  | -0.071 | 0.002  | 0.196  | -0.096 | -0.270 |       |       |  |
| <i>ADV</i>                     | -0.108 | 0.096  | 0.025  | -0.051 | 0.114  | 0.059  | 0.158  | -0.024 | -0.035 | 0.059  | -0.025 | -0.163 | -0.121 | 0.027  | -0.046 | 0.032  | 0.096  | 0.098  | -0.121 | 0.132  | 0.149  | -0.155 | 0.008 |       |  |
| <i>Size</i>                    | -0.122 | -0.069 | 0.014  | 0.004  | 0.450  | 0.248  | -0.034 | -0.075 | -0.188 | 0.263  | -0.065 | 0.079  | 0.012  | -0.093 | 0.027  | 0.007  | 0.362  | -0.048 | -0.117 | 0.069  | 0.163  | 0.116  | 0.042 | 0.057 |  |

Panel B: Correlation of Major Variables (IT=IT Labor)

|                                | 1      | 2      | 3      | 4      | 5      | 6      | 7      | 8      | 9      | 10     | 11     | 12     | 13     | 14     | 15     | 16     | 17     | 18     | 19     | 20     | 21     | 22     | 23    | 24    |  |
|--------------------------------|--------|--------|--------|--------|--------|--------|--------|--------|--------|--------|--------|--------|--------|--------|--------|--------|--------|--------|--------|--------|--------|--------|-------|-------|--|
| <i>IT</i>                      |        |        |        |        |        |        |        |        |        |        |        |        |        |        |        |        |        |        |        |        |        |        |       |       |  |
| <i>AvgIT_InterlockFirm</i>     | 0.101  |        |        |        |        |        |        |        |        |        |        |        |        |        |        |        |        |        |        |        |        |        |       |       |  |
| <i>MatchedInterlockIT</i>      | -0.073 | -0.026 |        |        |        |        |        |        |        |        |        |        |        |        |        |        |        |        |        |        |        |        |       |       |  |
| <i>NeighborhoodIT</i>          | 0.105  | -0.035 | -0.008 |        |        |        |        |        |        |        |        |        |        |        |        |        |        |        |        |        |        |        |       |       |  |
| <i>log(#InterlockFirms)</i>    | -0.069 | -0.068 | 0.006  | -0.065 |        |        |        |        |        |        |        |        |        |        |        |        |        |        |        |        |        |        |       |       |  |
| <i>AvgIWRank_InterlockFirm</i> | 0.029  | -0.088 | -0.009 | 0.129  | 0.259  |        |        |        |        |        |        |        |        |        |        |        |        |        |        |        |        |        |       |       |  |
| <i>CR4</i>                     | -0.218 | 0.035  | 0.069  | -0.076 | 0.101  | 0.082  |        |        |        |        |        |        |        |        |        |        |        |        |        |        |        |        |       |       |  |
| <i>Uncertainty</i>             | 0.040  | -0.064 | 0.000  | 0.008  | -0.084 | 0.034  | 0.011  |        |        |        |        |        |        |        |        |        |        |        |        |        |        |        |       |       |  |
| <i>Diversification</i>         | 0.083  | -0.024 | -0.007 | -0.036 | -0.285 | -0.080 | -0.076 | 0.025  |        |        |        |        |        |        |        |        |        |        |        |        |        |        |       |       |  |
| <i>AdjustedROA</i>             | -0.055 | -0.061 | 0.033  | 0.049  | 0.037  | -0.017 | 0.166  | -0.094 | -0.061 |        |        |        |        |        |        |        |        |        |        |        |        |        |       |       |  |
| <i>Leverage</i>                | 0.079  | -0.077 | 0.056  | 0.033  | 0.065  | 0.011  | -0.253 | -0.066 | -0.078 | -0.212 |        |        |        |        |        |        |        |        |        |        |        |        |       |       |  |
| <i>Growth</i>                  | -0.140 | -0.023 | 0.026  | 0.035  | -0.066 | -0.003 | 0.081  | 0.052  | 0.025  | 0.167  | -0.107 |        |        |        |        |        |        |        |        |        |        |        |       |       |  |
| <i>Auto</i>                    | 0.067  | -0.070 | -0.053 | 0.057  | 0.023  | -0.059 | -0.251 | -0.011 | -0.026 | -0.284 | 0.216  | 0.034  |        |        |        |        |        |        |        |        |        |        |       |       |  |
| <i>Trans</i>                   | 0.139  | 0.093  | 0.009  | 0.035  | -0.071 | 0.004  | -0.027 | 0.122  | 0.046  | 0.016  | -0.087 | -0.061 | -0.258 |        |        |        |        |        |        |        |        |        |       |       |  |
| <i>HighTech</i>                | 0.021  | -0.019 | -0.041 | 0.024  | 0.010  | -0.040 | -0.016 | 0.085  | 0.082  | 0.108  | -0.028 | 0.012  | -0.189 | 0.076  |        |        |        |        |        |        |        |        |       |       |  |
| <i>IndustryIT</i>              | 0.196  | 0.043  | 0.041  | 0.012  | 0.065  | 0.072  | -0.120 | 0.046  | -0.063 | -0.039 | 0.085  | 0.018  | 0.031  | 0.024  | -0.086 |        |        |        |        |        |        |        |       |       |  |
| <i>Tobin's Q</i>               | 0.014  | -0.011 | 0.044  | 0.026  | 0.012  | 0.103  | 0.107  | 0.023  | 0.117  | 0.455  | -0.201 | 0.137  | -0.136 | 0.067  | 0.064  | -0.049 |        |        |        |        |        |        |       |       |  |
| <i>InterlockDrivenIT</i>       | 0.134  | 0.873  | -0.010 | 0.016  | -0.040 | 0.155  | 0.046  | -0.055 | -0.014 | -0.059 | -0.081 | -0.005 | -0.076 | 0.101  | -0.030 | 0.077  | 0.021  |        |        |        |        |        |       |       |  |
| <i>ResidualIT</i>              | 0.993  | -0.003 | -0.072 | 0.104  | -0.065 | 0.011  | -0.226 | 0.047  | 0.085  | -0.048 | 0.089  | -0.141 | 0.077  | 0.129  | 0.024  | 0.188  | 0.012  | 0.016  |        |        |        |        |       |       |  |
| <i>IndustryQ</i>               | -0.104 | 0.059  | 0.072  | 0.037  | 0.013  | 0.066  | 0.327  | 0.073  | -0.041 | 0.447  | -0.167 | 0.095  | -0.287 | 0.118  | 0.188  | -0.071 | 0.327  | 0.064  | -0.113 |        |        |        |       |       |  |
| <i>MarketShare</i>             | -0.179 | -0.026 | 0.115  | -0.042 | 0.149  | 0.108  | 0.612  | -0.114 | -0.056 | 0.061  | -0.062 | -0.032 | -0.027 | -0.071 | -0.091 | -0.109 | 0.056  | -0.009 | -0.180 | 0.092  |        |        |       |       |  |
| <i>PPE</i>                     | 0.030  | -0.048 | -0.035 | 0.104  | -0.008 | -0.031 | -0.393 | -0.110 | 0.082  | -0.131 | 0.332  | 0.032  | 0.397  | -0.255 | -0.188 | 0.037  | -0.120 | -0.055 | 0.036  | -0.209 | -0.120 |        |       |       |  |
| <i>RD</i>                      | -0.004 | -0.060 | -0.054 | -0.013 | 0.005  | 0.010  | -0.017 | 0.242  | 0.120  | 0.150  | -0.198 | -0.022 | -0.119 | -0.111 | 0.432  | -0.042 | 0.201  | -0.072 | 0.005  | 0.196  | -0.096 | -0.270 |       |       |  |
| <i>ADV</i>                     | -0.109 | 0.092  | 0.024  | -0.052 | 0.114  | 0.059  | 0.158  | -0.024 | -0.035 | 0.059  | -0.025 | -0.163 | -0.121 | 0.027  | -0.046 | 0.029  | 0.096  | 0.090  | -0.121 | 0.132  | 0.149  | -0.155 | 0.008 |       |  |
| <i>Size</i>                    | -0.124 | -0.070 | 0.012  | 0.003  | 0.450  | 0.248  | -0.034 | -0.075 | -0.188 | 0.263  | -0.065 | 0.079  | 0.012  | -0.093 | 0.027  | 0.006  | 0.362  | -0.062 | -0.118 | 0.069  | 0.163  | 0.116  | 0.042 | 0.057 |  |

Table A3: Ten Largest Companies (Total Assets) in Our Sample and Their Interlocked Firms, 2008

| Company name                 | #InterlockFirms | List of interlocked firms                                                                                                                                                                                                                                                                        |
|------------------------------|-----------------|--------------------------------------------------------------------------------------------------------------------------------------------------------------------------------------------------------------------------------------------------------------------------------------------------|
| American International Group | 14              | Campbell Soup Co, EQT Corp, PepsiCo Inc., Pfizer In., Symantec Corp, Intuit Inc., Digital River Inc., Visa Inc., HSN Inc., Kate Spade & Co, Harley-Davidson Inc., Hillshire Brands Co, Intl Flavors & Fragrances, 3M Co                                                                          |
| Hartford Financial Services  | 9               | Alcoa Inc., CSX Corp, Rayonier Inc., Tenet Healthcare Corp, Cedar Realty Trust Inc., United Technologies Corp, DTE Energy Co, Hershey Co, American Electric Power Co                                                                                                                             |
| Ford Motor Co                | 11              | Conagra Foods Inc., Intel Corp, Lilly (Eli) & Co, New York Times Co -Cl A, Twenty-First Century Fox Inc., United States Steel Corp, AGCO Corp, Lauder (Estee) Cos Inc., Masco Corp, DTE Energy Co, Centene Corp                                                                                  |
| Chevron Corp                 | 15              | Amgen Inc., Cummins Inc., General Electric Co, McDonald's Corp, New York Times Co, Nordstrom Inc., Northrop Grumman Corp, Wells Fargo & Co, Dell Inc., Exponent Inc., Callaway Golf Co, Coca-Cola Co, Vulcan Materials Co, Honeywell International Inc., Franklin Resources Inc.                 |
| Time Warner Inc.             | 6               | Omnicom Group, FedEx Corp, Macy's Inc., Sun Microsystems Inc., Kb Home, Mondelez International Inc.                                                                                                                                                                                              |
| Genworth Financial Inc.      | 11              | Interpublic Group Of Cos, Tenet Healthcare Corp, Sigma-Aldrich Corp, Scientific Games Corp, Express Scripts Holding Co, Corporate Executive Brd Co, Nasdaq OMX Group Inc., MasterCard Inc., Kate Spade & Co, Hess Corp, Textron Inc.                                                             |
| Johnson & Johnson            | 11              | JPMorgan Chase & Co, Weyerhaeuser Co, Xerox Corp, Agilent Technologies Inc., MetLife Inc., Prudential Financial Inc., AMN Healthcare Services Inc., Neustar Inc., Meredith Corp, Hershey Co, Genuine Parts Co                                                                                    |
| Aflac Inc.                   | 3               | Total System Services Inc., Synovus Financial Corp, Tupperware Brands Corp                                                                                                                                                                                                                       |
| Cisco Systems Inc.           | 7               | Autodesk Inc., Dionex Corp, National Semiconductor Corp, Wells Fargo & Co, Wal-Mart Stores Inc., Yahoo Inc., Google Inc.                                                                                                                                                                         |
| United Technologies Corp     | 16              | Intl Paper Co, Marathon Oil Corp, Tenet Healthcare Corp, Northrop Grumman Corp, Wells Fargo & Co, ConocoPhillips, Procter & Gamble Co, Schlumberger Ltd, Texas Instruments Inc., DirecTV, United States Steel Corp, Intuit Inc., Eclipsys Corp, Aon Plc, Hartford Financial Services, Deere & Co |

Table A4: Three Most Frequent SIC Codes of Interlocked Firms across Industries

| 2-digit SIC | Industry name                           | Three most frequent 2-digit SIC codes of interlocked firms |                |                |
|-------------|-----------------------------------------|------------------------------------------------------------|----------------|----------------|
|             |                                         | Most freq.                                                 | 2nd-most freq. | 3rd-most freq. |
|             |                                         | (firm-year frequency in parentheses)                       |                |                |
| 01          | Agricultural Production – Crops         | 37 (7)                                                     | 38 (7)         | 64 (7)         |
| 10          | Metal, Mining                           | 13 (12)                                                    | 35 (9)         | 49 (9)         |
| 12          | Coal Mining                             | 49 (22)                                                    | 13 (18)        | 28 (9)         |
| 13          | Oil & Gas Extraction                    | 13 (270)                                                   | 28 (105)       | 49 (102)       |
| 14          | Nonmetallic Minerals, Except Fuels      | 60 (17)                                                    | 28 (14)        | 35 (9)         |
| 15          | General Building Contractors            | 73 (27)                                                    | 63 (20)        | 13 (18)        |
| 16          | Heavy Construction, Except Building     | 13 (27)                                                    | 36 (18)        | 49 (17)        |
| 17          | Special Trade Contractors               | 35 (11)                                                    | 49 (11)        | 36 (8)         |
| 20          | Food & Kindred Products                 | 73 (158)                                                   | 28 (147)       | 60 (112)       |
| 21          | Tobacco Products                        | 73 (9)                                                     | 28 (8)         | 27 (7)         |
| 22          | Textile Mill Products                   | 36 (11)                                                    | 73 (8)         | 28 (7)         |
| 23          | Apparel & Other Textile Products        | 73 (23)                                                    | 60 (22)        | 28 (21)        |
| 24          | Lumber & Wood Products                  | 38 (21)                                                    | 60 (16)        | 27 (14)        |
| 25          | Furniture & Fixtures                    | 36 (37)                                                    | 49 (29)        | 73 (28)        |
| 26          | Paper & Allied Products                 | 49 (103)                                                   | 28 (101)       | 60 (82)        |
| 27          | Printing & Publishing                   | 28 (71)                                                    | 35 (55)        | 60 (54)        |
| 28          | Chemical & Allied Products              | 28 (446)                                                   | 38 (249)       | 35 (238)       |
| 29          | Petroleum & Coal Products               | 28 (82)                                                    | 49 (45)        | 73 (40)        |
| 30          | Rubber & Misc. Plastics Products        | 28 (54)                                                    | 48 (35)        | 20 (30)        |
| 31          | Leather & Leather Products              | 56 (22)                                                    | 60 (10)        | 25 (9)         |
| 32          | Stone, Clay, & Glass Products           | 13 (11)                                                    | 42 (10)        | 60 (10)        |
| 33          | Primary Metal Industries                | 28 (69)                                                    | 35 (56)        | 49 (47)        |
| 34          | Fabricated Metal Products               | 49 (50)                                                    | 35 (49)        | 28 (44)        |
| 35          | Industrial Machinery & Equipment        | 36 (363)                                                   | 35 (342)       | 73 (248)       |
| 36          | Electronic & Other Electric Equip.      | 36 (410)                                                   | 35 (363)       | 38 (218)       |
| 37          | Transportation Equipment                | 35 (126)                                                   | 28 (116)       | 49 (101)       |
| 38          | Instruments & Related Products          | 28 (249)                                                   | 38 (232)       | 36 (218)       |
| 39          | Misc. Manufacturing Industries          | 73 (41)                                                    | 28 (28)        | 59 (22)        |
| 40          | Railroad Transportation                 | 60 (30)                                                    | 28 (29)        | 20 (27)        |
| 42          | Trucking & Warehousing                  | 73 (34)                                                    | 49 (23)        | 34 (16)        |
| 44          | Water Transportation                    | 13 (26)                                                    | 49 (22)        | 60 (17)        |
| 45          | Transportation by Air                   | 35 (31)                                                    | 48 (23)        | 37 (21)        |
| 47          | Transportation Services                 | 36 (14)                                                    | 49 (12)        | 63 (12)        |
| 48          | Communications                          | 28 (99)                                                    | 73 (84)        | 49 (74)        |
| 49          | Electric, Gas, & Sanitary Services      | 60 (276)                                                   | 28 (202)       | 49 (162)       |
| 50          | Wholesale Trade - Durable Goods         | 28 (91)                                                    | 60 (69)        | 73 (68)        |
| 51          | Wholesale Trade - Nondur. Goods         | 28 (45)                                                    | 63 (35)        | 35 (33)        |
| 52          | Building Materials & Gardening Supplies | 49 (19)                                                    | 36 (18)        | 20 (16)        |
| 53          | General Merchandise Stores              | 73 (61)                                                    | 20 (53)        | 28 (39)        |
| 54          | Food Stores                             | 73 (25)                                                    | 49 (23)        | 63 (22)        |
| 55          | Automotive Dealers & Service Stations   | 60 (16)                                                    | 49 (15)        | 53 (12)        |
| 56          | Apparel & Accessory Stores              | 59 (57)                                                    | 56 (46)        | 57 (35)        |
| 57          | Furniture & Homefurnishings Stores      | 56 (35)                                                    | 73 (27)        | 59 (20)        |
| 58          | Eating & Drinking Places                | 60 (63)                                                    | 20 (52)        | 73 (40)        |
| 59          | Miscellaneous Retail                    | 56 (57)                                                    | 28 (55)        | 73 (44)        |
| 60          | Depository Institutions                 | 49 (276)                                                   | 28 (191)       | 35 (162)       |
| 61          | Nondepository Institutions              | 73 (49)                                                    | 28 (36)        | 49 (35)        |
| 62          | Security & Commodity Brokers            | 73 (68)                                                    | 28 (66)        | 36 (46)        |
| 63          | Insurance Carriers                      | 73 (171)                                                   | 28 (162)       | 60 (130)       |
| 64          | Insurance Agents, Brokers, & Serv.      | 35 (41)                                                    | 49 (29)        | 48 (19)        |
| 65          | Real Estate                             | 67 (7)                                                     | 73 (7)         | 49 (6)         |
| 67          | Holding & Other Investment Offices      | 67 (124)                                                   | 49 (38)        | 60 (35)        |

|    |                                   |          |          |          |
|----|-----------------------------------|----------|----------|----------|
| 70 | Hotels & Other Lodging Places     | 49 (18)  | 61 (11)  | 73 (9)   |
| 72 | Personal Services                 | 28 (10)  | 49 (9)   | 26 (8)   |
| 73 | Business Services                 | 73 (514) | 35 (248) | 36 (218) |
| 75 | Auto Repair, Services, & Parking  | 20 (19)  | 36 (14)  | 59 (14)  |
| 78 | Motion Pictures                   | 73 (9)   | 53 (6)   | 28 (3)   |
| 79 | Amusement & Recreation Services   | 49 (25)  | 60 (20)  | 48 (12)  |
| 80 | Health Services                   | 28 (75)  | 80 (64)  | 63 (53)  |
| 83 | Social Services                   | 40 (4)   | 38 (2)   | 48 (2)   |
| 87 | Engineering & Management Services | 73 (60)  | 35 (54)  | 28 (38)  |
| 99 | Non-Classifiable Establishments   | 28 (15)  | 20 (14)  | 73 (14)  |

---

Table A5: Distribution of Number of Board Meetings by Industry

| 2-digit<br>SIC | Industry name                            | # of board meetings |      |      |
|----------------|------------------------------------------|---------------------|------|------|
|                |                                          | Median              | Min. | Max. |
| 01             | Agricultural Production - Crops          | 7                   | 6    | 12   |
| 10             | Metal, Mining                            | 8                   | 5    | 20   |
| 12             | Coal Mining                              | 10.5                | 4    | 21   |
| 13             | Oil & Gas Extraction                     | 6.5                 | 4    | 21   |
| 14             | Nonmetallic Minerals, Except Fuels       | 5                   | 4    | 11   |
| 15             | General Building Contractors             | 7                   | 4    | 14   |
| 16             | Heavy Construction, Except Building      | 8                   | 5    | 18   |
| 17             | Special Trade Contractors                | 8                   | 8    | 8    |
| 20             | Food & Kindred Products                  | 7                   | 4    | 25   |
| 21             | Tobacco Products                         | 7                   | 7    | 10   |
| 22             | Textile Mill Products                    | 7                   | 5    | 10   |
| 23             | Apparel & Other Textile Products         | 6                   | 4    | 25   |
| 24             | Lumber & Wood Products                   | 6                   | 4    | 17   |
| 25             | Furniture & Fixtures                     | 5                   | 4    | 13   |
| 26             | Paper & Allied Products                  | 6                   | 4    | 16   |
| 27             | Printing & Publishing                    | 6                   | 4    | 24   |
| 28             | Chemical & Allied Products               | 7                   | 4    | 32   |
| 29             | Petroleum & Coal Products                | 8                   | 6    | 12   |
| 30             | Rubber & Miscellaneous Plastics Products | 6                   | 5    | 13   |
| 31             | Leather & Leather Products               | 5                   | 4    | 9    |
| 32             | Stone, Clay, & Glass Products            | 6                   | 5    | 13   |
| 33             | Primary Metal Industries                 | 8                   | 4    | 37   |
| 34             | Fabricated Metal Products                | 6.5                 | 4    | 34   |
| 35             | Industrial Machinery & Equipment         | 6                   | 4    | 19   |
| 36             | Electronic & Other Electric Equipment    | 7                   | 4    | 25   |
| 37             | Transportation Equipment                 | 7                   | 3    | 17   |
| 38             | Instruments & Related Products           | 7                   | 4    | 23   |
| 39             | Miscellaneous Manufacturing Industries   | 6                   | 4    | 10   |
| 40             | Railroad Transportation                  | 6                   | 4    | 8    |
| 42             | Trucking & Warehousing                   | 6                   | 4    | 10   |
| 44             | Water Transportation                     | 10                  | 7    | 15   |
| 45             | Transportation by Air                    | 9                   | 5    | 14   |
| 47             | Transportation Services                  | 6                   | 4    | 8    |
| 48             | Communications                           | 8                   | 1    | 14   |
| 49             | Electric, Gas, & Sanitary Services       | 8                   | 4    | 49   |
| 50             | Wholesale Trade - Durable Goods          | 6                   | 4    | 19   |
| 51             | Wholesale Trade - Nondurable Goods       | 7                   | 5    | 13   |
| 52             | Building Materials & Gardening Supplies  | 4                   | 4    | 4    |
| 53             | General Merchandise Stores               | 7                   | 4    | 16   |
| 54             | Food Stores                              | 7                   | 6    | 13   |
| 55             | Automotive Dealers & Service Stations    | 6                   | 5    | 11   |
| 56             | Apparel & Accessory Stores               | 7                   | 3    | 28   |
| 57             | Furniture & Homefurnishings Stores       | 6.5                 | 4    | 12   |
| 58             | Eating & Drinking Places                 | 7                   | 3    | 13   |
| 59             | Miscellaneous Retail                     | 7                   | 4    | 29   |
| 60             | Depository Institutions                  | 15                  | 15   | 15   |
| 61             | Nondepository Institutions               | 8                   | 4    | 19   |
| 62             | Security & Commodity Brokers             | 6                   | 4    | 18   |
| 63             | Insurance Carriers                       | 7                   | 4    | 34   |
| 64             | Insurance Agents, Brokers, & Service     | 7                   | 4    | 17   |
| 65             | Real Estate                              | 10                  | 9    | 13   |
| 67             | Holding & Other Investment Offices       | 9                   | 9    | 9    |
| 70             | Hotels & Other Lodging Places            | 6                   | 1    | 21   |

|    |                                   |     |   |    |
|----|-----------------------------------|-----|---|----|
| 72 | Personal Services                 | 6   | 4 | 13 |
| 73 | Business Services                 | 7   | 4 | 20 |
| 75 | Auto Repair, Services, & Parking  | 7   | 5 | 8  |
| 78 | Motion Pictures                   | 7   | 4 | 13 |
| 79 | Amusement & Recreation Services   | 6   | 5 | 11 |
| 80 | Health Services                   | 5   | 4 | 12 |
| 83 | Social Services                   | 5.5 | 4 | 7  |
| 87 | Engineering & Management Services | 6   | 4 | 14 |
| 99 | Non-Classifiable Establishments   | 8   | 7 | 9  |

---

Table A6: Performance Effects of Board-Interlock-Driven IT Investment Conditional on the Focal Firm's IT Capability

|                             | DV=TobinsQ               |                         |                          |                         |
|-----------------------------|--------------------------|-------------------------|--------------------------|-------------------------|
|                             | IT=CRM&SCM               |                         | IT=IT Labor              |                         |
|                             | (1)<br>#Meetings<br>High | (2)<br>#Meetings<br>Low | (3)<br>#Meetings<br>High | (4)<br>#Meetings<br>Low |
| InterlockDrivenIT_High_Rank | 9.876***<br>(1.291)      | 0.222<br>(3.487)        | 0.133***<br>(0.016)      | -0.003<br>(0.043)       |
| InterlockDrivenIT_Low_Rank  | 7.437***<br>(1.466)      | -1.787<br>(3.603)       | 0.099***<br>(0.019)      | -0.030<br>(0.044)       |
| ResidualIT                  | 0.997***<br>(0.146)      | 1.175*<br>(0.506)       | 0.013***<br>(0.002)      | 0.014*<br>(0.006)       |
| Lag(TobinsQ)                | 0.788***<br>(0.007)      | 0.771***<br>(0.015)     | 0.787***<br>(0.007)      | 0.772***<br>(0.015)     |
| IndustryQ                   | 0.262***<br>(0.011)      | -0.124<br>(0.075)       | 0.260***<br>(0.011)      | -0.129+<br>(0.075)      |
| MarketShare                 | -0.011<br>(0.014)        | -0.274***<br>(0.045)    | -0.007<br>(0.014)        | -0.279***<br>(0.044)    |
| PPE                         | 0.151***<br>(0.018)      | 0.124<br>(0.117)        | 0.145***<br>(0.018)      | 0.115<br>(0.116)        |
| RD                          | -0.083<br>(0.134)        | -0.078<br>(0.525)       | -0.092<br>(0.140)        | -0.130<br>(0.518)       |
| ADV                         | 0.089<br>(0.191)         | 2.944***<br>(0.587)     | 0.102<br>(0.193)         | 2.933***<br>(0.584)     |
| Size                        | 0.068***<br>(0.004)      | 0.085***<br>(0.011)     | 0.069***<br>(0.004)      | 0.085***<br>(0.011)     |
| MonitorIntensive            | -0.038***<br>(0.009)     | 0.026<br>(0.023)        | -0.038***<br>(0.009)     | 0.025<br>(0.023)        |
| IndependentDirector         | 0.035<br>(0.142)         | 0.014<br>(0.097)        | 0.033<br>(0.143)         | 0.016<br>(0.096)        |
| CEO_Duality                 | -0.040***<br>(0.007)     | -0.136***<br>(0.022)    | -0.039***<br>(0.007)     | -0.137***<br>(0.022)    |
| Observations                | 616                      | 277                     | 616                      | 277                     |
| R-squared                   | 0.802                    | 0.837                   | 0.802                    | 0.837                   |
| Number of firms             | 301                      | 159                     | 301                      | 159                     |
| Year&industry FE            | YES                      | YES                     | YES                      | YES                     |

Standard errors are in parentheses and calculated by clustering firms and using heteroscedasticity-consistent estimation; \*\*\* p<0.001, \*\* p<0.01, \* p<0.05, +p<0.1;

InterlockDrivenIT\_High\_Rank (InterlockDrivenIT\_Low\_Rank) is the board-interlock-driven IT investment of the focal firm with IW ranking higher (lower) than the sample mean; other variables are defined in Table A1.

## Part B: Three-Way Interaction Analysis

In addition to the sample-split specification in the main analyses, we use a three-way interaction approach to test the joint effect of average IT of interlocked firms (*AvgIT\_InterlockFirm*), the average IW ranking of interlocked firms (*AvgIWRank\_InterlockFirm*), and the number of board meetings (*#Meetings*) on the focal firm's IT investment. We use this alternative model (based on a three-way interaction) to assess the robustness of our empirical results. The three-way interaction model is as follows:

$$\begin{aligned}
 IT_{lt} = & \alpha + \beta_1(AvgIT\_InterlockFirm_{lt}) + \beta_2(AvgIWRank\_InterlockFirm_{lt}) \\
 & + \beta_3(\#Meetings_{lt}) \\
 & + \beta_4(AvgIT\_InterlockFirm_{lt} \times AvgIWRank\_InterlockFirm_{lt}) \\
 & + \beta_5(AvgIT\_InterlockFirm_{lt} \times \#Meetings_{lt}) \\
 & + \beta_6(AvgIWRank\_InterlockFirm_{lt} \times \#Meetings_{lt}) \\
 & + \beta_7(AvgIT\_InterlockFirm_{lt} \times AvgIWRank\_InterlockFirm_{lt} \\
 & \times \#Meetings_{lt}) \\
 & + \sum_k \theta_k(Control\ Variable\ k_{lt}) + \varepsilon_{lt}
 \end{aligned} \tag{B1}$$

for which *IT* is either *CRM&SCM* or *IT Labor*; *#Meetings* is the within-industry percentile rank of the number of board meetings; other variables are defined in Table A1.

We expect the coefficient  $\beta_7$  (on the three-way interaction term) to be positive. We report the regression results in Table B1. We find that the coefficient on the three-way interaction term is positive and significant, suggesting that the focal firm is more influenced by its interlocked partners that have higher IT capability when the board is active with frequent board meetings. The three-way interaction model thus lends further support to H1c.

We also follow Aral et al. (2012) and present a graphical cube view of the three-way interaction. Figure B1 shows a  $1 \times 1 \times 1$  cube with the *x*-axis representing average IT of interlocked firms (*AvgIT\_InterlockFirm*), the *y*-axis representing the average IW ranking of interlocked firms (*AvgIWRank\_InterlockFirm*), and the *z*-axis representing the number of board meetings (*#Meetings*). The cube-view analysis (Aral et al. 2012) uses a binary version of the variables to label the coordinates in the cube, with 0 denoting a low level and 1 denoting a high level. For example, the coordinate (1, 1, 1) indicates a firm with high levels of average IT, IW ranking of interlocked firms, and number of board meetings. We define a high (low) level of a variable as its sample mean plus (minus) one standard deviation.

We have applied the cube-analysis for both IT measures, *CRM&SCM* or *IT Labor*. Take *CRM&SCM* as an example. When the number of board meetings is high, the effect of interlocked firms' IT (i.e., an increase of focal firms' IT when an interlocked firm's IT increases from a low level to a high level) on the focal firm's IT is 0.537 ( $p=0.002$ ) when the average IW ranking of interlocked firms is high. The effect of interlocked firms' IT on the focal firm's IT is 0.055 ( $p=0.573$ ) when the average IW ranking of interlocked firms is low. The difference between these two numbers—labeled as *Diff(#Meetings\_High)*—is 0.483 ( $p=0.003$ ), indicating that interlocked firms' IW ranking positively moderates the relationship between a focal firm's IT investment and that of its interlocked firms.

When the number of board meetings is low, the effect of interlocked firms' IT on the focal firm's IT is 0.351 ( $p=0.088$ ) when the average IW ranking of interlocked firms is high. The effect of interlocked firms' IT on the focal firm's IT is 0.162 ( $p=0.459$ ) when the average IW ranking of interlocked firms is low. The difference between these two numbers—labeled as *Diff(#Meetings\_Low)*—is 0.189 ( $p=0.298$ ), indicating that the moderation effect of interlocked firms' IW ranking is not statistically significant when the number of board meetings is low.

The cube analysis further compares the difference between the moderation effects of interlocked firms' IW ranking in the two *#Meetings\_High* and *#Meetings\_Low* cases by comparing *Diff(#Meetings\_High)* and *Diff(#Meetings\_Low)*. The difference is 0.294, which is statistically significant ( $p=0.044$ ). This indicates that the moderation effect is significantly stronger when the focal firm holds more board meetings with its interlocked firms, thus lending support to H1c.

In conclusion, the regressions using the three-way interaction approach (Table B1) and the cube view (Figure B1) are consistent with what we have found in our main analyses.

**Reference:**

Aral, S. Brynjolfsson, E., Wu. L. 2012. Three-way complementarities: Performance pay, human resource analytics, and information technology. *Management Science* 58(5):913–931.

Table B1: Regressions Using the Three-way Interaction Approach

|                                                           | IT=CRM&SCM<br>(1)    | IT=IT Labor<br>(2)   |
|-----------------------------------------------------------|----------------------|----------------------|
| AvgIT_InterlockFirm                                       | 0.234***<br>(0.034)  | 0.242***<br>(0.034)  |
| AvgIT_InterlockFirm X AvgIWRank_InterlockFirm             | 0.253**<br>(0.083)   | 0.235**<br>(0.080)   |
| AvgIT_InterlockFirm X AvgIWRank_InterlockFirm X #Meetings | 0.272*<br>(0.115)    | 0.311**<br>(0.111)   |
| AvgIT_InterlockFirm X #Meetings                           | 0.003<br>(0.052)     | -0.016<br>(0.052)    |
| AvgIWRank_InterlockFirm X #Meetings                       | 0.000<br>(0.002)     | 0.018<br>(0.141)     |
| #Meetings                                                 | 0.001+<br>(0.001)    | 0.101+<br>(0.055)    |
| AvgIWRank_InterlockFirm                                   | 0.005***<br>(0.001)  | 0.387***<br>(0.095)  |
| Ln(#InterlockFirm)                                        | -0.005***<br>(0.001) | -0.400***<br>(0.044) |
| AvgIT_InterlockFirm X Ln(#InterlockFirm)                  | -0.332***<br>(0.053) | -0.323***<br>(0.055) |
| MatchedInterlockIT                                        | -0.048**<br>(0.015)  | -0.045**<br>(0.015)  |
| NeighborhoodIT                                            | 0.145***<br>(0.017)  | 0.142***<br>(0.018)  |
| CR4                                                       | 0.003<br>(0.002)     | 0.166<br>(0.166)     |
| Uncertainty                                               | 0.011<br>(0.008)     | 0.839<br>(0.660)     |
| Diversification                                           | 0.001<br>(0.001)     | 0.118<br>(0.078)     |
| AdjustedROA                                               | 0.007+<br>(0.004)    | 0.446<br>(0.328)     |
| Leverage                                                  | 0.001<br>(0.002)     | 0.023<br>(0.190)     |
| Growth                                                    | -0.023***<br>(0.002) | -1.787***<br>(0.169) |
| Auto                                                      | 0.008+<br>(0.004)    | 0.681*<br>(0.341)    |
| Trans                                                     | 0.016***<br>(0.004)  | 1.253***<br>(0.333)  |
| HighTech                                                  | 0.001<br>(0.002)     | 0.101<br>(0.179)     |
| IndustryIT                                                | 0.247***<br>(0.073)  | 0.239**<br>(0.076)   |
| MonitorIntensive                                          | 0.001**<br>(0.000)   | 0.097**<br>(0.031)   |
| IndependentDirector                                       | -0.004+<br>(0.002)   | -0.266+<br>(0.152)   |
| CEO_Duality                                               | -0.002***<br>(0.000) | -0.126***<br>(0.038) |
| Observations                                              | 739                  | 739                  |
| R-squared                                                 | 0.278                | 0.278                |
| Number of firms                                           | 326                  | 326                  |
| Year&industry FE                                          | YES                  | YES                  |

Standard errors are in parentheses and calculated by clustering firms and using heteroscedasticity-consistent estimation; \*\*\* p<0.001, \*\* p<0.01, \* p<0.05, +p<0.1

Figure B1: Cube View of Three-Way Interactions

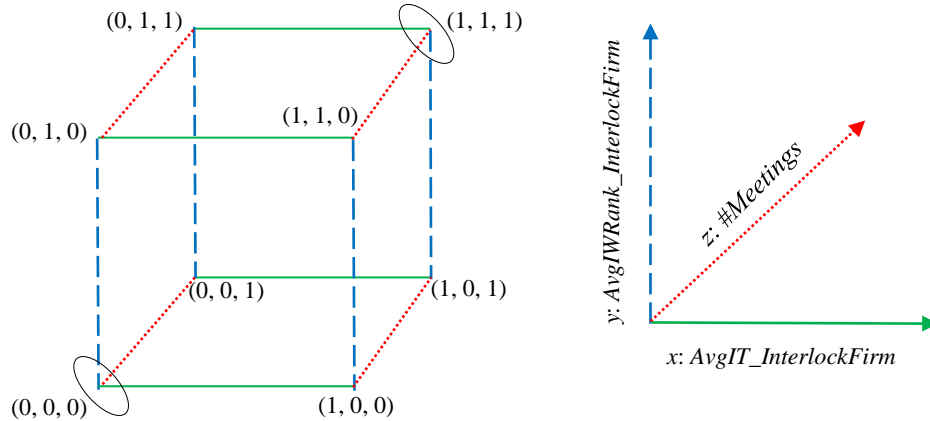

| IT=CRM&SCM                                          |                                                        |         |                                                                                       |
|-----------------------------------------------------|--------------------------------------------------------|---------|---------------------------------------------------------------------------------------|
|                                                     | Effect of interlocked firms' IT on the focal firm's IT | p-value |                                                                                       |
| <b>#Meetings High</b>                               |                                                        |         |                                                                                       |
| <i>AvgWRank_InterlockFirm</i> (High)                | 0.537**                                                | 0.002   | F(1,1,1)-F(0,1,1)                                                                     |
| <i>AvgWRank_InterlockFirm</i> (Low)                 | 0.055                                                  | 0.573   | F(1,0,1)-F(0,0,1)                                                                     |
| <u>Diff (#Meetings High)</u>                        | 0.483**                                                | 0.003   | [F(1,0,1)-F(0,0,1)]-[F(1,1,1)-F(0,1,1)]                                               |
| <b>#Meetings Low</b>                                |                                                        |         |                                                                                       |
| <i>AvgWRank_InterlockFirm</i> (High)                | 0.351†                                                 | 0.088   | F(1,1,0)-F(0,1,0)                                                                     |
| <i>AvgWRank_InterlockFirm</i> (Low)                 | 0.162                                                  | 0.459   | F(1,0,0)-F(0,0,0)                                                                     |
| <u>Diff (#Meetings Low)</u>                         | 0.189                                                  | 0.298   | [F(1,0,1)-F(0,0,1)]-[F(1,1,1)-F(0,1,1)]                                               |
| <u>Diff (#Meetings High) - Diff (#Meetings Low)</u> | 0.294*                                                 | 0.044   | {[F(1,0,1)-F(0,0,1)]-[F(1,1,1)-F(0,1,1)]} - {[F(1,0,1)-F(0,0,1)]-[F(1,1,1)-F(0,1,1)]} |

| IT=IT Labor                                         |                                                        |         |                                                                                       |
|-----------------------------------------------------|--------------------------------------------------------|---------|---------------------------------------------------------------------------------------|
|                                                     | Effect of interlocked firms' IT on the focal firm's IT | p-value |                                                                                       |
| <b>#Meetings High</b>                               |                                                        |         |                                                                                       |
| <i>AvgWRank_InterlockFirm</i> (High)                | 0.553**                                                | 0.001   | F(1,1,1)-F(0,1,1)                                                                     |
| <i>AvgWRank_InterlockFirm</i> (Low)                 | 0.051                                                  | 0.599   | F(1,0,1)-F(0,0,1)                                                                     |
| <u>Diff (#Meetings High)</u>                        | 0.503**                                                | 0.004   | [F(1,0,1)-F(0,0,1)]-[F(1,1,1)-F(0,1,1)]                                               |
| <b>#Meetings Low</b>                                |                                                        |         |                                                                                       |
| <i>AvgWRank_InterlockFirm</i> (High)                | 0.350†                                                 | 0.086   | F(1,1,0)-F(0,1,0)                                                                     |
| <i>AvgWRank_InterlockFirm</i> (Low)                 | 0.172                                                  | 0.446   | F(1,0,0)-F(0,0,0)                                                                     |
| <u>Diff (#Meetings Low)</u>                         | 0.178                                                  | 0.341   | [F(1,0,1)-F(0,0,1)]-[F(1,1,1)-F(0,1,1)]                                               |
| <u>Diff (#Meetings High) - Diff (#Meetings Low)</u> | 0.325*                                                 | 0.0387  | {[F(1,0,1)-F(0,0,1)]-[F(1,1,1)-F(0,1,1)]} - {[F(1,0,1)-F(0,0,1)]-[F(1,1,1)-F(0,1,1)]} |

The tests are based on regression results from Table B1, where *AvgWRank\_InterlockFirm* High (Low) means one standard deviation above (below) the mean; \*\*\* p<0.001, \*\* p<0.01, \* p<0.05, + p<0.1
